# Supplementary material
Source: Research Square preprint supplement (doi:10.21203/rs.3.rs-9347297/v1)
Supplement: Supplementary file 1 [file 64ea8485708495a4ffe359e0.xlsx]

## Sheet: Cover sheet
SUPPORTING INFORMATION 2
PlasticFADE: A predictive model for plastic fragmentation and degradation in the environment
Yibo Tang, Nadim Saadi, Jérôme Lavoie, Anne-Marie Boulay
Corresponding author: Anne-Marie Boulay, anne-marie.boulay@polymtl.ca, CIRAIG, Department of Chemical Engineering, Polytechnique Montréal, 3333 Queen Mary Road, suite 310, Montréal, Québec, H3V 1A2, Canada
This document contains the PlasticFADE model ("Model interface" and "Drop-down lists"), calculation details for the environmental stresses ("Env. stresses"), data points used for model calibration ("Calibration"), uncertainty in the model parameters ("Uncertainty"), model results with associated uncertainty ("Results"), data used to create Figs. 1 and 2 ("Rate constants"), Fig. 3 ("Sankey"), Fig.…

## Sheet: Model interface
Model interface
Model inputs
Input	Value	Instruction			Dependence
Polymer (i)	PP	Please choose an option from the list provided			Polymer-specific empirical constants
Size category	Macroplastics	Please choose an option from the list provided			Mass balance equations of the system
Shape	Irregular	Please choose an option from the list provided			P_j in air and water (via the drag coefficient)
Compartment (j)	Beach	Please choose an option from the list provided			Environmental stresses—rep. values & equations
Surface area [cm2]	466.527	Please specify the total SA of one plastic item			SA:V
Volume [cm3]	18.6611	Please specify the total volume of one plastic item			SA:V; P_j in topsoil and beach (via the item's mass)
Density [g/cm-3]	0.9	Please specify the density of the polymer			P_j in topsoil and beach (via the item's mass)
Initial mass [kg]	100	(Opt.) Specify the initial mass of the emitted plastic
Time [yr]	10	(Opt.) Specify the duration following the emission
Input variables
SA:V [cm-1]	25
Environmental stresses	(Compartment-specific)	I_j [W/m2]	12.5
		P_j [mW]	0.0263614
		C_j [CFU/ml]	12500000
Note: The calculation of P_j requires additional input (see "Drop-down lists").
Fitted parameters
Empirical constants	(Polymer-specific)	a_i	delta_i	b_i	alpha_i	c_i	beta_i
		4.65659e-06	2.25917	0.000534127	5e-13	8.67563	1.43633
		x_i	tau_i	y_i	theta_i	z_i	eta_i
		0.00549819	0.0137208	0.0172452	0.705493	1.61585e-05	0.442109
Modeling results
Fragmentation rate constant [d-1]	0.000317293
Degradation rate constant [d-1]	0.000716222
Additional results
Residence time (macro) [yr]	18.3116
Residence time (total) [yr]	26.4239
Mass of remaining macroplastics	2.29984
Mass of secondary microplastics	5.02271
Mass of degradation products	92.6775
Notes: 1. For the underlying data and calculations, please refer to other Excel sheets. 2. The residence time provides a rough estimate by assuming first-order kinetics and excluding the transfer of plastics between compartments. The lifespan of macroplastics is defined as the time until their mass declines to 0.1% of the initial value, while the total plastic lifespan is the time when only 0.1% …

## Sheet: Drop-down lists
Fitted model parameters, entries in the drop-down lists, and additional model input
Polymer-specific empirical constants – Fragmentation									Model input to be chosen					Representative environmental stresses in each compartment
Index (i)	Polymer	a_i	delta_i	b_i	alpha_i	c_i	beta_i		Polymer	Size category	Shape	Compartment		Index (j)	Compartment	I_j [W/m2]	P_j [mW]	C_j [CFU/ml]
1	HDPE	N/A	N/A	N/A	N/A	N/A	N/A		(Select an option)	(Select an option)	(Select an option)	(Select an option)		1	Air	10	0.0040425	0.5
2	LDPE	N/A	N/A	N/A	N/A	N/A	N/A		HDPE	Macroplastics	Sphere	Air		2	Topsoil	0.1	0.00115331	670000000
3	PE	N/A	N/A	N/A	N/A	N/A	N/A		LDPE	Micro/Nanoplastics	Cube	Topsoil		3	Subsoil	0	0	121000000
4	PP	4.65659e-06	2.25917	0.000534127	5e-13	8.67563	1.43633		PE		Film	Subsoil		4	Beach	12.5	0.0263614	12500000
5	PS	0.00722963	3.90386	3.26878e-10	0.549757	55.7464	4.94685		PP		Fiber	Beach		5	Water surface	10	0.0033	250000
6	PET	N/A	N/A	N/A	N/A	N/A	N/A		PS		Irregular	Water surface		6	Water column	0	1.6896e-06	38500
7	EPS	0.0290164	9.30393e-12	1.69763e-07	4.94176	19.9123	1.34463		PET			Water column		7	Sediment	0	0	482000
8	PVC	N/A	N/A	N/A	N/A	N/A	N/A		EPS			Sediment		Note: P_j in air, water surface, and water column is quantified using the drag equation (ρmedium, Cd, A, and v required), while P_j in topsoil and beach is quantified using the equation of friction (ρmedium, g, and volume & density of the plastic object required).
9	PLA	N/A	N/A	N/A	N/A	N/A	N/A		PVC
10	PA	N/A	N/A	N/A	N/A	N/A	N/A		PLA
									PA
Polymer-specific empirical constants – Degradation														Input parameters for calculating P_j
Index (i)	Polymer	x_i	tau_i	y_i	theta_i	z_i	eta_i		Quantification of environmental stresses and weight loss					Drag coefficient (Cd)			Other parameters
1	HDPE	0.0102628	3.35841e-11	0.00218253	0.299049	0.000378032	0.216488		Source of UV	Source of power	Info on microbes	Info on control		Shape	Compartment	Value	Parameter	Value
2	LDPE	0.0110506	5e-13	0.0103146	0.00436202	0.000104755	0.32406		Artificial UV	Frictional force	CFU/ml	Accounted for		Sphere	–	0.47	ρ_air [kg/m3]	1.225
3	PE	4.72183e-09	1.34765	0.000367842	4.98976	5.33151e-05	0.65085		Sunlight (Intensity)	Drag force	Cells/ml	Not available		Cube	–	1.05	ρ_water [kg/m3]	1000
4	PP	0.00549819	0.0137208	0.0172452	0.705493	1.61585e-05	0.442109		Sunlight (UV Index)	Shear force	OD600	Reported		Film	Air	1.2	μ_beach [-]	0.4
5	PS	0.000273254	0.243292	0.014447	1.00907	6.23305e-05	0.496037		UV + Sunlight	N.A.	N.A.			Film	Water surface	1.2	μ_topsoil [-]	0.35
6	PET	0.000243276	0.790976	1.3262e-05	1.8763	0.0152179	0.0784619		N.A.					Film	Water column	0.005	g [m/s2]	9.81
7	EPS	N/A	N/A	N/A	N/A	N/A	N/A							Fiber	Air	1.2	v_wind [m/s]	5
8	PVC	N/A	N/A	N/A	N/A	N/A	N/A		Additional model input			Additional input		Fiber	Water surface	1.2	v_surface [m/s]	0.5
9	PLA	N/A	N/A	N/A	N/A	N/A	N/A		Size class	Examples		f_C		Fiber	Water column	0.005	v_column [m/s]	0.04
10	PA	N/A	N/A	N/A	N/A	N/A	N/A		(Selece an option)	N/A		N/A		Irregular	–	1.5	v_beach [m/s]	0.02
									Large (> 50 cm)	Mulching films, fishing nets		0.005		Note: 'Irregular' includes all other unlisted shapes.			v_topsoil [m/s]	0.001
									Medium (5 – 50 cm)	Beverage bottles, food containers		0.02		Inputs	A [m2] (*)	0.0044	Size class (**)	Medium (5 – 50 cm)
									Small (5 mm – 5 cm)	Cigarette butts, bottle caps		0.2		* Please specify the projected area oriented in the direction of wind, waves, or currents.
									Micro (1 μm – 5 mm)	Microbeads, microfibers		0.5		** Please select the size class that most accurately represents the emitted plastic objects.
									Nano (< 1 μm)	Nanobeads, nanofibers		1

## Sheet: Env. stresses
Calculation details for the magnitudes of environmental stresses
Data point					UV exposure							Exposure to mechanical stress – Information				Exposure to mechanical stress – Calculation																		Exposure to microbes				Notes on environmental stresses
D.P.I.	I_j [W/m2]	P_j [mW]	C_j [CFU/ml]	Reference	Source of UV	UVA [W/m2]	UVB [W/m2]	UVC [W/m2]	Sunlight [W/m2]	UV index [-]	I [W/m2]	Shape and size of one item	Information given	Assumptions made	Source of power	m_plastic [g]	r_pellet [m]	RS [rpm]	r_container [m]	ω [rad/s]	v_edge [m/s]	m_sand [g]	d_pellet [m]	p_contact [-]	FN [N]	CF [-]	v_relative [m/s]	γ [s-1]	τ [Pa]	D vs. D_water	CSA [m2]	FF/FD/FS [N]	P [mW]	Given info	Stage	Value	C [CFU/ml]
F-PP-01	11.17	0	0	Song (2017)	Artificial UV	11.01	0.12	0.04			11.17	Sphere, V = 19 mm3			N.A.																		0	N.A.			0
F-PP-02	27.5	0	0	Song (2022)	Sunlight (Intensity given)				550		27.5	Block, 5 cm × 3 cm × 0.45 cm			N.A.																		0	N.A.			0
F-PP-03	27.5	0	0	Song (2023)	Sunlight (Intensity given)				550		27.5	Sheet, 5 cm × 1.5 cm × 1 mm			N.A.																		0	N.A.			0
F-PP-04	0	0.0277744	0	Song (2017)	N.A.						0	Sphere, V = 19 mm3	m_sand = 50 g, RS = 37 rpm, V_bottle = 60 mL	r_bottle = 1.5 cm, D_pellet = 0.9 g/cm3	Frictional force	0.0171	0.00165534	37	0.015	3.87463	0.0581195	50	0.00331069	0.0121785	0.00597356	0.2	0.0116239					0.00238942	0.0277744	N.A.			0
F-PP-05	0	0.296088	0	Song (2023)	N.A.						0	Sheet, 5 cm × 1.5 cm × 1 mm	V_water = 10 mL	V_vial = 25 mL, RS = 3000 rpm, r_vial = 1 cm	Shear force			3000	0.01	314.159	3.14159					0.2	0.628319	628.319	0.628319		0.00075	0.000471239	0.296088	N.A.			0
F-PP-06	0	0.0098696	0	Chubarenko (2020)	N.A.						0	Fragment, 2 cm × 2 cm × 0.5 mm	V_container = 100 L, D_fragment = 0.86 g/cm3, m_sand = 40 kg, V_water = 20 L, RS = 30 rpm	r_container = 0.25 m	Shear force			30	0.25	3.14159	0.785398					0.2	0.15708	157.08	0.15708		0.0004	6.28319e-05	0.0098696	N.A.			0
F-PP-07	0	0.000112294	0	Zha (2023)	N.A.						0	Sheet, 4 mm × 4 mm × 0.5 mm	RS = 100 rpm, V_flask = 250 mL, V_medium = 100 mL	r_flask = 4 cm	Shear force			100	0.04	10.472	0.418879					0.2	0.0837758	83.7758	0.0837758		1.6e-05	1.34041e-06	0.000112294	N.A.			0
F-PP-08	4.99	0.000112294	0	Zha (2023)	Artificial UV	0	0	4.99			4.99	Sheet, 4 mm × 4 mm × 0.5 mm	RS = 100 rpm, V_flask = 250 mL, V_medium = 100 mL	r_flask = 4 cm	Shear force			100	0.04	10.472	0.418879					0.2	0.0837758	83.7758	0.0837758		1.6e-05	1.34041e-06	0.000112294	N.A.			0
F-PP-09	1.65	0.000251523	25000	Reineccius (2023)	Artificial UV	0	1.65	0			1.65	Sphere, d = 3.5 ~ 4.5 mm (4 mm)	m_sand = 20 g, V_water = 15 mL, V_flask = 100 mL, RS =130 rpm, D_pellet = 0.910 g/cm3	r_flask = 3 cm	Drag force		0.002	130	0.03	13.6136	0.408407					0.2	0.0816814					3.07932e-06	0.000251523	CFU/ml	Average	25000	25000	Microbial concentration taken from Table S3 (water surface). Assume a microbial removal rate of 90% by the 0.7 μm microfiber filter.
D-PP-01	11.17	0	0	Song (2017)	Artificial UV	11.01	0.12	0.04			11.17	Sphere, V = 19 mm3			N.A.																		0	N.A.			0
D-PP-02	1.776	0	0	Bhat (2024)	Sunlight (UV Index given)					1.11	1.776	Sphere, d = 3.079 μm			N.A.																		0	N.A.			0
D-PP-03	0	0	1239000000	Auta (2018)	N.A.						0	Sphere, d = 2.4 mm			N.A.																		0	OD600	Average	0.7	1239000000
D-PP-04	0	4.65094e-05	1504500000	Auta (2017)	N.A.						0	Sphere, d = 200 μm	RS = 150 rpm, V_medium = 300 mL, D_particle= 0.9 g/mL	V_flask = 500 mL, r_flask = 5 cm	Drag force		0.0001	150	0.05	15.708	0.785398					0.2	0.15708					2.96088e-07	4.65094e-05	OD600	Average	0.85	1504500000
D-PP-05	0	0	1239000000	Skariyachan (2018)	N.A.						0	Sphere, d = 2.5 mm			N.A.																		0	OD600	Start	0.7	1239000000
D-PP-06	0	0.000701839	177000000	Wichatham (2024)	N.A.						0	Fragment, 1 cm × 1 cm × 0.5 mm	V_medium = 90 mL	RS = 100 rpm, V_flask = 250 mL, r_flask = 4 cm	Shear force			100	0.04	10.472	0.418879					0.2	0.0837758	83.7758	0.0837758		0.0001	8.37758e-06	0.000701839	OD600	Start	0.1	177000000
D-PP-07	0	0	10620000000	Jeon (2021)	N.A.						0	Film, 15 cm × 15 cm × 0.05 mm			N.A.																		0	OD600	Average	6	10620000000
D-PP-08	0	0.00199859	4000000	Aravinthan (2016)	N.A.						0	Film, 1.5 cm × 1.5 cm × 0.05 mm	V_medium = 20 mL, RS = 180 rpm	V_flask = 50 mL, r_flask = 2.5 cm	Shear force			180	0.025	18.8496	0.471239					0.2	0.0942478	94.2478	0.0942478		0.000225	2.12058e-05	0.00199859	CFU/ml	Average	4000000	4000000
D-PP-09	14	0	72	Zhu (2020)	Artificial UV	14	0	0			14	Cuboid, average size = 2.75 mm			N.A.																		0	Cells/ml	Average	90	72
D-PP-10	1.65	0.000251523	25000	Reineccius (2023)	Artificial UV	0	1.65	0			1.65	Sphere, d = 3.5 ~ 4.5 mm (4 mm)	m_sand = 20 g, V_water = 15 mL, V_flask = 100 mL, RS =130 rpm, D_pellet = 0.910 g/cm3	r_flask = 3 cm	Drag force		0.002	130	0.03	13.6136	0.408407					0.2	0.0816814					3.07932e-06	0.000251523	CFU/ml	Average	25000	25000	Microbial concentration taken from Table S3 (water surface). Assume a microbial removal rate of 90% by the 0.7 μm microfiber filter.
F-PS-01	27.5	0	0	Song (2022)	Sunlight (Intensity given)				550		27.5	Block, 5 cm × 3 cm × 0.4 cm			N.A.																		0	N.A.			0
F-PS-02	28.08	0	0	Lambert (2016)	UV + Sunlight (Intensity)	8.33			395		28.08	Sheet, 1 cm × 1 cm × 0.5 mm			N.A.																		0	N.A.			0
F-PS-03	60	0	0	Pfohl (2025)	Sunlight (Intensity given)				1200		60	Film, th = 0.7 mm			N.A.																		0	N.A.			0
F-PS-04	0	0.0197392	0	Chubarenko (2020)	N.A.						0	Fragment, 2 cm × 2 cm × 0.5 mm	V_container = 100 L, D_fragment = 1.05 g/cm3, m_sand = 40 kg, V_water = 20 L, RS = 30 rpm	r_container = 0.25 m	Shear force			30	0.25	3.14159	0.785398					0.2	0.15708	157.08	0.15708		0.0008	0.000125664	0.0197392	N.A.			0
F-PS-05	0	0.00140368	0	Lv (2024)	N.A.						0	Film, 1 cm × 1 cm × 0.03 mm	RS = 100 rpm, V_flask = 250 mL, V_medium = 50 mL	r_flask = 4 cm, D_film > 1.0 g/cm3	Shear force			100	0.04	10.472	0.418879					0.2	0.0837758	83.7758	0.0837758		0.0002	1.67552e-05	0.00140368	N.A.			0
F-PS-06	1.65	0.000220083	25000	Reineccius (2023)	Artificial UV	0	1.65	0			1.65	Sphere, d = 3.0 ~ 4.0 mm (3.5 mm)	m_sand = 20 g, V_water = 15 mL, V_flask = 100 mL, RS =130 rpm, D_pellet = 1.050 g/cm3	r_flask = 3 cm	Drag force		0.00175	130	0.03	13.6136	0.408407					0.2	0.0816814					2.6944e-06	0.000220083	CFU/ml	Average	25000	25000	Microbial concentration taken from Table S3 (water surface). Assume a microbial removal rate of 90% by the 0.7 μm microfiber filter.
D-PS-01	1.776	0	0	Bhat (2024)	Sunlight (UV Index given)					1.11	1.776	Cuboid, 3.361 μm = L = W = 3 × H			N.A.																		0	N.A.			0
D-PS-02	27.5	0	0	Ward (2019)	Sunlight (Intensity given)				550		27.5	Film, 8 cm × 1.5 cm × 196 μm			N.A.																		0	N.A.			0
D-PS-03	27.5	0	0	Ward (2019)	Sunlight (Intensity given)				550		27.5	Film, 8 cm × 1.5 cm × 56 μm			N.A.																		0	N.A.			0
D-PS-04	0	0.00140368	159300000	Lv (2024)	N.A.						0	Film, 1 cm × 1 cm × 0.03 mm	RS = 100 rpm, V_flask = 250 mL, V_medium = 50 mL	r_flask = 4 cm, D_film > 1.0 g/cm3	Shear force			100	0.04	10.472	0.418879					0.2	0.0837758	83.7758	0.0837758		0.0002	1.67552e-05	0.00140368	OD600	Average	0.09	159300000
D-PS-05	0	0.000161704	9.8058e+08	Safdar (2024)	N.A.						0	Fragment, 4 mm × 4 mm × 0.5 mm	RS = 120 rpm, V_flask = 250 mL, V_medium = 100 mL, D_fragment = 0.98 g/cm3	r_flask = 4 cm	Shear force			120	0.04	12.5664	0.502655					0.2	0.100531	100.531	0.100531		1.6e-05	1.6085e-06	0.000161704	OD600	End	0.554	9.8058e+08
D-PS-06	0	0.000161704	646050000	Safdar (2024)	N.A.						0	Fragment, 4 mm × 4 mm × 0.5 mm	RS = 120 rpm, V_flask = 250 mL, V_medium = 100 mL, D_fragment = 0.98 g/cm3	r_flask = 4 cm	Shear force			120	0.04	12.5664	0.502655					0.2	0.100531	100.531	0.100531		1.6e-05	1.6085e-06	0.000161704	OD600	End	0.365	646050000
D-PS-07	0	0.000161704	1734600000	Safdar (2024)	N.A.						0	Fragment, 4 mm × 4 mm × 0.5 mm	RS = 120 rpm, V_flask = 250 mL, V_medium = 100 mL, D_fragment = 0.98 g/cm3	r_flask = 4 cm	Shear force			120	0.04	12.5664	0.502655					0.2	0.100531	100.531	0.100531		1.6e-05	1.6085e-06	0.000161704	OD600	End	0.98	1734600000
D-PS-08	0	4.65094e-05	1486800000	Auta (2017)	N.A.						0	Sphere, d = 200 μm	RS = 150 rpm, V_medium = 300 mL, D_particle= 1.59 g/mL	V_flask = 500 mL, r_flask = 5 cm	Drag force		0.0001	150	0.05	15.708	0.785398					0.2	0.15708					2.96088e-07	4.65094e-05	OD600	Average	0.84	1486800000
D-PS-09	1.65	0.000220083	25000	Reineccius (2023)	Artificial UV	0	1.65	0			1.65	Sphere, d = 3.0 ~ 4.0 mm (3.5 mm)	m_sand = 20 g, V_water = 15 mL, V_flask = 100 mL, RS =130 rpm, D_pellet = 1.050 g/cm3	r_flask = 3 cm	Drag force		0.00175	130	0.03	13.6136	0.408407					0.2	0.0816814					2.6944e-06	0.000220083	CFU/ml	Average	25000	25000	Microbial concentration taken from Table S3 (water surface). Assume a microbial removal rate of 90% by the 0.7 μm microfiber filter.
F-EPS-01	11.17	0	0	Song (2017)	Artificial UV	11.01	0.12	0.04			11.17	Sphere, V = 22 mm3			N.A.																			N.A.			0
F-EPS-02	9.625	0	0	Song (2020)	Sunlight (Intensity given)				192.5		9.625	Block, 3 cm × 3 cm × 2.5 cm			N.A.																		0	N.A.			0
F-EPS-03	0	0.030626	0	Song (2017)	N.A.						0	Sphere, V = 22 mm3	m_sand = 50 g, RS = 37 rpm, V_bottle = 60 mL	r_bottle = 1.5 cm, D_pellet = 0.015 g/cm3	Frictional force	0.00033	0.00173825	37	0.015	3.87463	0.0581195	50	0.00347649	0.0134289	0.00658687	0.2	0.0116239					0.00263475	0.030626	N.A.			0
F-EPS-04	0	0.0592176	0	Chubarenko (2020)	N.A.						0	Block, 2 cm × 2 cm × 2 cm	V_container = 100 L, D_block = 0.01 g/cm3, m_sand = 40 kg, V_water = 20 L, RS = 30 rpm	r_container = 0.25 m	Shear force			30	0.25	3.14159	0.785398					0.2	0.15708	157.08	0.15708		0.0024	0.000376991	0.0592176	N.A.			0
F-EPS-05	0	0.000112294	0	Zha (2023)	N.A.						0	Sheet, 4 mm × 4 mm × 1 mm	RS = 100 rpm, V_flask = 250 mL, V_medium = 100 mL	r_flask = 4 cm	Shear force			100	0.04	10.472	0.418879					0.2	0.0837758	83.7758	0.0837758		1.6e-05	1.34041e-06	0.000112294	N.A.			0
F-EPS-06	4.99	0.000112294	0	Zha (2023)	Artificial UV	0	0	4.99			4.99	Sheet, 4 mm × 4 mm × 1 mm	RS = 100 rpm, V_flask = 250 mL, V_medium = 100 mL	r_flask = 4 cm	Shear force			100	0.04	10.472	0.418879					0.2	0.0837758	83.7758	0.0837758		1.6e-05	1.34041e-06	0.000112294	N.A.			0
D-EPS-01	11.17	0	0	Song (2017)	Artificial UV	11.01	0.12	0.04			11.17	Sphere, V = 22 mm3			N.A.																		0	N.A.			0
D-EPS-02	9.625	0	0	Song (2020)	Sunlight (Intensity given)				192.5		9.625	Block, 3 cm × 3 cm × 2.5 cm			N.A.																		0	N.A.			0
D-EPS-03	14	0	40	Zhu (2020)	Artificial UV	14	0	0			14	Cuboid, average size = 3.32 mm			N.A.																		0	Cells/ml	Average	50	40
F-PET-01	1.65	0.000204362	25000	Reineccius (2023)	Artificial UV	0	1.65	0			1.65	Sphere, d = 3.0 ~ 3.5 mm (3.25 mm)	m_sand = 20 g, V_water = 15 mL, V_flask = 100 mL, RS =130 rpm, D_pellet = 1.340 g/cm3	r_flask = 3 cm	Drag force		0.001625	130	0.03	13.6136	0.408407					0.2	0.0816814					2.50194e-06	0.000204362	CFU/ml	Average	25000	25000	Microbial concentration taken from Table S3 (water surface). Assume a microbial removal rate of 90% by the 0.7 μm microfiber filter.
D-PET-01	1.776	0	0	Bhat (2024)	Sunlight (UV Index given)					1.11	1.776	Cuboid, 3.525 μm = L = W = 3 × H			N.A.																		0	N.A.			0
D-PET-02	65	0	0	Sait (2021)	Sunlight (Intensity given)				1300		65	Fiber, l = 1.346 mm, d = 0.01 mm			N.A.																		0	N.A.			0	UV radiation in artificial freshwater (MC assumed to be 0).
D-PET-03	0	0.000323407	748710000	Safdar (2024)	N.A.						0	Fragment, 4 mm × 4 mm × 0.3 mm	RS = 120 rpm, V_flask = 250 mL, V_medium = 100 mL, D_fragment = 1.35 g/cm3	r_flask = 4 cm	Shear force			120	0.04	12.5664	0.502655					0.2	0.100531	100.531	0.100531		3.2e-05	3.21699e-06	0.000323407	OD600	End	0.423	748710000
D-PET-04	0	0.000323407	205320000	Safdar (2024)	N.A.						0	Fragment, 4 mm × 4 mm × 0.3 mm	RS = 120 rpm, V_flask = 250 mL, V_medium = 100 mL, D_fragment = 1.35 g/cm3	r_flask = 4 cm	Shear force			120	0.04	12.5664	0.502655					0.2	0.100531	100.531	0.100531		3.2e-05	3.21699e-06	0.000323407	OD600	End	0.116	205320000
D-PET-05	0	0.000323407	1354050000	Safdar (2024)	N.A.						0	Fragment, 4 mm × 4 mm × 0.3 mm	RS = 120 rpm, V_flask = 250 mL, V_medium = 100 mL, D_fragment = 1.35 g/cm3	r_flask = 4 cm	Shear force			120	0.04	12.5664	0.502655					0.2	0.100531	100.531	0.100531		3.2e-05	3.21699e-06	0.000323407	OD600	End	0.765	1354050000
D-PET-06	0	4.65094e-05	1150500000	Auta (2017)	N.A.						0	Sphere, d = 200 μm	RS = 150 rpm, V_medium = 300 mL, D_particle= 1.68 g/mL	V_flask = 500 mL, r_flask = 5 cm	Drag force		0.0001	150	0.05	15.708	0.785398					0.2	0.15708					2.96088e-07	4.65094e-05	OD600	Average	0.65	1150500000
D-PET-07	0	0	349000000000	Auta (2022)	N.A.						0	Sphere, d = 2 mm			N.A.																		0	CFU/ml	Start	349000000000	349000000000
D-PET-08	65	0	250000	Sait (2021)	Sunlight (Intensity given)				1300		65	Fiber, l = 1.346 mm, d = 0.01 mm			N.A.																		0	CFU/ml	Average	250000	250000	UV radiation in natural seawater (MC taken from Table S3_water surface).
D-PET-09	1.65	0.000204362	25000	Reineccius (2023)	Artificial UV	0	1.65	0			1.65	Sphere, d = 3.0 ~ 3.5 mm (3.25 mm)	m_sand = 20 g, V_water = 15 mL, V_flask = 100 mL, RS =130 rpm, D_pellet = 1.340 g/cm3	r_flask = 3 cm	Drag force		0.001625	130	0.03	13.6136	0.408407					0.2	0.0816814					2.50194e-06	0.000204362	CFU/ml	Average	25000	25000	Microbial concentration taken from Table S3 (water surface). Assume a microbial removal rate of 90% by the 0.7 μm microfiber filter.
F-HDPE-01	1.65	0.000251523	25000	Reineccius (2023)	Artificial UV	0	1.65	0			1.65	Sphere, d = 3.5 ~ 4.5 mm (4.0 mm)	m_sand = 20 g, V_water = 15 mL, V_flask = 100 mL, RS =130 rpm, D_pellet = 0.955 g/cm3	r_flask = 3 cm	Drag force		0.002	130	0.03	13.6136	0.408407					0.2	0.0816814					3.07932e-06	0.000251523	CFU/ml	Average	25000	25000	Microbial concentration taken from Table S3 (water surface). Assume a microbial removal rate of 90% by the 0.7 μm microfiber filter.
D-HDPE-01	1.776	0	0	Bhat (2024)	Sunlight (UV Index given)					1.11	1.776	Sphere, d = 4.430 μm			N.A.																		0	N.A.			0
D-HDPE-02	0	0	1239000000	Skariyachan (2018)	N.A.						0	Sphere, d = 2.5 mm			N.A.																		0	OD600	Start	0.7	1239000000
D-HDPE-03	0	0.00909583	300000000	Sharma (2024)	N.A.						0	Film, 2 cm × 2 cm × 0.05 mm	RS = 180 rpm, V_medium = 100 mL	V_flask = 250 mL, r_flask = 4 cm	Shear force			180	0.04	18.8496	0.753982					0.2	0.150796	150.796	0.150796		0.0004	6.03186e-05	0.00909583	CFU/ml	Average	300000000	300000000
D-HDPE-04	0	0.00909583	400000000	Sharma (2024)	N.A.						0	Film, 2 cm × 2 cm × 0.05 mm	RS = 180 rpm, V_medium = 100 mL	V_flask = 250 mL, r_flask = 4 cm	Shear force			180	0.04	18.8496	0.753982					0.2	0.150796	150.796	0.150796		0.0004	6.03186e-05	0.00909583	CFU/ml	Average	400000000	400000000
D-HDPE-05	0	0.000319775	1770000000	Kumari (2019)	N.A.						0	Film, 1 cm × 1 cm × 0.01 mm	RS = 180 rpm, V_medium = 30 mL, V_tube = 50 mL	r_tube = 1.5 cm	Shear force			180	0.015	18.8496	0.282743					0.2	0.0565487	56.5487	0.0565487		0.0001	5.65487e-06	0.000319775	OD600	Start	1	1770000000	Assume initial OD600 = 1.0 for the inoculum (with strain AIIW2)
D-HDPE-06	1.65	0.000251523	25000	Reineccius (2023)	Artificial UV	0	1.65	0			1.65	Sphere, d = 3.5 ~ 4.5 mm (4.0 mm)	m_sand = 20 g, V_water = 15 mL, V_flask = 100 mL, RS =130 rpm, D_pellet = 0.955 g/cm3	r_flask = 3 cm	Drag force		0.002	130	0.03	13.6136	0.408407					0.2	0.0816814					3.07932e-06	0.000251523	CFU/ml	Average	25000	25000	Microbial concentration taken from Table S3 (water surface). Assume a microbial removal rate of 90% by the 0.7 μm microfiber filter.
D-HDPE-07	14	0	32	Zhu (2020)	Artificial UV	14	0	0			14	Cuboid, average size = 3.08 mm			N.A.																		0	Cells/ml	Average	40	32
F-LDPE-01	27.5	0	0	Song (2022)	Sunlight (Intensity given)				550		27.5	Block, 5 cm × 3 cm × 0.48 cm			N.A.																		0	N.A.			0
F-LDPE-02	60	0	0	Pfohl (2025)	Sunlight (Intensity given)				1200		60	Film, th = 0.7 mm			N.A.																		0	N.A.			0
D-LDPE-01	1.776	0	0	Bhat (2024)	Sunlight (UV Index given)					1.11	1.776	Sphere, d = 4.613 μm			N.A.																		0	N.A.			0
D-LDPE-02	0	0	1239000000	Skariyachan (2018)	N.A.						0	Sphere, d = 2.5 mm			N.A.																		0	OD600	Start	0.7	1239000000
D-LDPE-03	0	3.21949e-05	5500000000	Rad (2022)	N.A.						0	Sphere, d = 338 μm	RS = 160 rpm, V_medium = 20 mL, D_particle= 0.92 g/mL	V_flask = 100 mL, r_flask = 3 cm	Drag force		0.000169	160	0.03	16.7552	0.502655					0.2	0.100531					3.20249e-07	3.21949e-05	CFU/ml	Average	5500000000	5500000000
D-LDPE-04	0	0.0013324	1720440000	Hou (2022)	N.A.						0	Sheet, 1.5 cm × 1 cm × 0.008 mm	RS = 180 rpm, V_flask = 50 mL, V_medium = 30 mL, D_sheet = 0.92 g/cm3	r_flask = 2.5 cm	Shear force			180	0.025	18.8496	0.471239					0.2	0.0942478	94.2478	0.0942478		0.00015	1.41372e-05	0.0013324	OD600	Average	0.972	1720440000
D-LDPE-05	0	0.0204656	8000000000	Gupta (2020)	N.A.						0	Film, 3 cm × 3 cm × 0.05 mm	RS = 180 rpm, V_medium = 100 mL	V_flask = 250 mL, r_flask = 4 cm	Shear force			180	0.04	18.8496	0.753982					0.2	0.150796	150.796	0.150796		0.0009	0.000135717	0.0204656	CFU/ml	Average	8000000000	8000000000
D-LDPE-06	0	0.0204656	8300000000	Gupta (2020)	N.A.						0	Film, 3 cm × 3 cm × 0.05 mm	RS = 180 rpm, V_medium = 100 mL	V_flask = 250 mL, r_flask = 4 cm	Shear force			180	0.04	18.8496	0.753982					0.2	0.150796	150.796	0.150796		0.0009	0.000135717	0.0204656	CFU/ml	Average	8300000000	8300000000
D-LDPE-07	0	0	2725800000	Kavitha (2021)	N.A.						0	Film, 3 cm × 3 cm × 0.02 mm			N.A.																		0	OD600	Start	1.54	2725800000
D-LDPE-08	0	0	9735000000	Jeon (2021)	N.A.						0	Film, 15 cm × 15 cm × 0.05 mm			N.A.																		0	OD600	Average	5.5	9735000000
D-PE-01	1.776	0	0	Bhat (2024)	Sunlight (UV Index given)					1.11	1.776	Sphere, d = 4.040 μm			N.A.																		0	N.A.			0
D-PE-02	0	0.000161704	2548800000	Safdar (2024)	N.A.						0	Film, 4 mm × 4 mm × 0.02 mm	RS = 120 rpm, V_flask = 250 mL, V_medium = 100 mL, D_film = 0.94 g/cm3	r_flask = 4 cm	Shear force			120	0.04	12.5664	0.502655					0.2	0.100531	100.531	0.100531		1.6e-05	1.6085e-06	0.000161704	OD600	End	1.44	2548800000
D-PE-03	0	0.000161704	893850000	Safdar (2024)	N.A.						0	Film, 4 mm × 4 mm × 0.02 mm	RS = 120 rpm, V_flask = 250 mL, V_medium = 100 mL, D_film = 0.94 g/cm3	r_flask = 4 cm	Shear force			120	0.04	12.5664	0.502655					0.2	0.100531	100.531	0.100531		1.6e-05	1.6085e-06	0.000161704	OD600	End	0.505	893850000
D-PE-04	0	0.000161704	1097400000	Safdar (2024)	N.A.						0	Film, 4 mm × 4 mm × 0.02 mm	RS = 120 rpm, V_flask = 250 mL, V_medium = 100 mL, D_film = 0.94 g/cm3	r_flask = 4 cm	Shear force			120	0.04	12.5664	0.502655					0.2	0.100531	100.531	0.100531		1.6e-05	1.6085e-06	0.000161704	OD600	End	0.62	1097400000
D-PE-05	0	1.7441e-05	1239000000	Auta (2017)	N.A.						0	Sphere, d = 75 μm	RS = 150 rpm, V_medium = 300 mL, D_particle= 0.94 g/mL	V_flask = 500 mL, r_flask = 5 cm	Drag force		3.75e-05	150	0.05	15.708	0.785398					0.2	0.15708					1.11033e-07	1.7441e-05	OD600	Average	0.7	1239000000
D-PE-06	0	1.9844e-05	267270000	He (2025)	N.A.						0	Sphere, d = 75 μm	RS = 200 rpm, V_medium = 120 mL	V_flask = 250 mL, r_flask = 4 cm	Drag force		3.75e-05	200	0.04	20.944	0.837758					0.2	0.167552					1.18435e-07	1.9844e-05	OD600	Average	0.151	267270000	Initial OD600 = 0.9, 4% dilution (0.036), ∆OD600 = 0.115
D-PE-07	14	0	72	Zhu (2020)	Artificial UV	14	0	0			14	Granule, d = 2 mm			N.A.																		0	Cells/ml	Average	90	72
F-PVC-01	1.65	0.000251523	25000	Reineccius (2023)	Artificial UV	0	1.65	0			1.65	Sphere, d = 3.8 ~ 4.2 mm (4.0 mm)	m_sand = 20 g, V_water = 15 mL, V_flask = 100 mL, RS =130 rpm, D_pellet = 1.560 g/cm3	r_flask = 3 cm	Drag force		0.002	130	0.03	13.6136	0.408407					0.2	0.0816814					3.07932e-06	0.000251523	CFU/ml	Average	25000	25000	Microbial concentration taken from Table S3 (water surface). Assume a microbial removal rate of 90% by the 0.7 μm microfiber filter.
D-PVC-01	49.7359	0	0	Wang (2014)	Sunlight (Intensity given)				994.718		49.7359	Film, 4 cm × 4 cm × 0.04 mm			N.A.																		0	N.A.			0
D-PVC-02	0	3.21949e-05	2500000000	Rad (2022)	N.A.						0	Sphere, d = 338 μm	RS =160 rpm, V_medium = 20 mL, D_particle= 0.54 g/mL	V_flask = 500 mL, r_flask = 5 cm	Drag force		0.000169	160	0.03	16.7552	0.502655					0.2	0.100531					3.20249e-07	3.21949e-05	CFU/ml	Average	2500000000	2500000000
D-PVC-03	0	0.00063955	1770000000	Kumari (2019)	N.A.						0	Film, 1 cm × 1 cm × 0.2 mm	RS = 180 rpm, V_medium = 30 mL, V_tube = 50 mL	r_tube = 1.5 cm	Shear force			180	0.015	18.8496	0.282743					0.2	0.0565487	56.5487	0.0565487		0.0002	1.13097e-05	0.00063955	OD600	Start	1	1770000000	Assume initial OD600 = 1.0 for the inoculum (with strain AIIW2)
D-PVC-04	1.65	0.000251523	25000	Reineccius (2023)	Artificial UV	0	1.65	0			1.65	Sphere, d = 3.8 ~ 4.2 mm (4.0 mm)	m_sand = 20 g, V_water = 15 mL, V_flask = 100 mL, RS =130 rpm, D_pellet = 1.560 g/cm3	r_flask = 3 cm	Drag force		0.002	130	0.03	13.6136	0.408407					0.2	0.0816814					3.07932e-06	0.000251523	CFU/ml	Average	25000	25000	Microbial concentration taken from Table S3 (water surface). Assume a microbial removal rate of 90% by the 0.7 μm microfiber filter.
D-PLA-01	0	0	6.30957e+06	Boonluksiri (2021)	N.A.						0	Sheet, 3 cm × 2 cm × 0.4 mm			N.A.																		0	CFU/ml	Average	6.30957e+06	6.30957e+06
D-PLA-02	0	0.00394784	1.00475e+07	Mistry (2022)	N.A.						0	Film, 2.5 cm × 2 cm × 0.035 mm	RS =120 rpm, V_medium = 25 mL, V_flask = 50 mL, D_film= 1.24 g/mL	r_flask = 2.5 cm	Shear force			120	0.025	12.5664	0.314159					0.2	0.0628319	62.8319	0.0628319		0.001	6.28319e-05	0.00394784	CFU/ml	Average	1.00475e+07	1.00475e+07	CFU/cm2 provided in the paper (10 cm2, 25 mL).
D-PLA-03	0	0.00394784	200475	Mistry (2022)	N.A.						0	Film, 2.5 cm × 2 cm × 0.035 mm	RS =120 rpm, V_medium = 25 mL, V_flask = 50 mL, D_film= 1.24 g/mL	r_flask = 2.5 cm	Shear force			120	0.025	12.5664	0.314159					0.2	0.0628319	62.8319	0.0628319		0.001	6.28319e-05	0.00394784	CFU/ml	Average	200475	200475	CFU/cm2 provided in the paper (10 cm2, 25 mL).
D-PLA-04	0	0.00454791	96465000	Yottakot (2019)	N.A.						0	Film, 1 cm × 1 cm × 0.05 mm	RS = 180 rpm, V_medium = 100 mL	V_flask = 250 mL, r_flask = 4 cm	Shear force			180	0.04	18.8496	0.753982					0.2	0.150796	150.796	0.150796		0.0002	3.01593e-05	0.00454791	OD600	Average	0.0545	96465000
F-PA-01	60	0	0	Pfohl (2022)	Sunlight (Intensity given)				1200		60	Film, th = 0.7 mm			N.A.																		0	N.A.			0
D-PA-01	65	0	0	Sait (2021)	Sunlight (Intensity given)				1300		65	Fiber, l = 1.453 mm, d = 0.01 mm			N.A.																		0	N.A.			0	UV radiation in artificial freshwater (MC assumed to be 0).
D-PA-02	65	0	250000	Sait (2021)	Sunlight (Intensity given)				1300		65	Fiber, l = 1.453 mm, d = 0.01 mm			N.A.																		0	CFU/ml	Average	250000	250000	UV radiation in natural seawater (MC taken from Table S3_water surface).
F-PU-01	60	0	0	Pfohl (2025)	Sunlight (Intensity given)				1200		60	Film, th = 0.7 mm			N.A.																		0	N.A.			0
F-PU-02	60	0	0	Pfohl (2022)	Sunlight (Intensity given)				1200		60	Film, th = 0.7 mm			N.A.																		0	N.A.			0
Abbreviations/symbols and their meanings: CoF–Coefficient of friction, CF–conversion factor, CSA–cross-sectional area, D–density, d–diameter, exp.–experimental, FD–drag force, FF–frictional force, FN–normal force, FS–shear force, h–height, m–mass, P–power, p–proportion, r–radius, RS–rotation speed, RSI–relative spectral irradiance, rpm–revolutions per minute, th–thickness, V–volume, v–velocity, W…
Notes: 1. D.P.I. is short for data point index (F: fragmentation, D: degradation) and is used to keep track of the converted data points. 2. The listed mechanical power represents the power acting on a single plastic item. 3. Frictional force is considered dominant for solid-solid interactions, while shear and drag forces are dominant for solid-liquid interactions (films in water–shear force, pel…
General assumptions: The kinetic CoF between dry sand and plastics is 0.4; μ_water = 0.001 Pa∙s; D_dry sand = 1.6 g/cm3; the relative velocity of plastics moving against sand or water equals 20% of the container's linear velocity at the edge; the effective thickness of the water layer shearing against the film or sheet is 1 mm (0.001 m); the radius of the container is assumed according to its vol…

## Sheet: Calibration
Converted data points for model calibration
D.P.I.	Polymer	R.E.S.	k [i,j] [d-1]	s [cm-1]	I_j [W/m2]	P_j [mW]	C_j [CFU/ml]	Exposure [d]	WL_actual [%]	WL_test group [%]	WL_control [%]	Info on control	Reference	Plastic item (per exp. group)	Shape	Exposure_CA	Assumptions or notes on the calculation of weight loss [%] or SA:V [cm-1]	Additional comment
F-PP-01	PP	UV	5.02264e-05	18.1231	11.17	0	0	180	0.9	0.9	0	Not available	Song (2017)	10 pellets (V = 19 mm3)	Sphere	6 months	2-month MA following 180 d and 360 d UV exposure has led to the same weight loss (FRAG) of plastics. Mass loss (180 d; 360 d): 1.2%, 2.1%.
F-PP-02	PP	UV	2.20232e-08	5.51111	27.5	0	0	180	0.000396417	0.000455815	5.93989e-05	Reported	Song (2022)	1 block (5 cm × 3 cm × 0.45 cm)	Block	180 days	GPs: 2.10E+05 (1.8 μm) + 2.70E+07 (236 nm). GPs (control): 2.10E+03 (4.4 μm) + 8.00E+05 (323 nm)..
F-PP-03	PP	UV	4.89775e-07	21.7333	27.5	0	0	176	0.00861967	0.0133015	0.00468183	Reported	Song (2023)	1 sheet (5 cm × 1.5 cm × 1 mm)	Sheet	176 days	Half the water was removed to assess the GPs from FRAG by UV only. GPs: 7.50E+05 (1.9 μm) + 2.70E+07 (296 nm). GPs (control): 3.60E+05 (1.7 μm) + 1.30E+07 (281 nm).
F-PP-04	PP	MS	5.00752e-05	18.1231	0	0.0277744	0	60	0.3	0.3	0	Not available	Song (2017)	10 pellets (V = 19 mm3)	Sphere	2 months	2-month MA following 180 d and 360 d UV exposure has led to the same weight loss (FRAG) of plastics. Mass loss (180 d; 360 d): 1.2%, 2.1%.
F-PP-05	PP	MS	0.046846	21.7333	0	0.296088	0	0.000347222	0.00162658	–	–	Accounted for	Song (2023)	1 sheet (5 cm × 1.5 cm × 1 mm)	Sheet	30 seconds	The remaining half + the plastic item was used to assess the GPs from FRAG by UV followed by MA. GPs: 2.50E+06 (1.3 μm) + 1.10E+08 (253 nm). The effect of impurities has already been accounted for through subtraction.
F-PP-06	PP	MS	4.00008e-05	42	0	0.0098696	0	1	0.004	0.004	0	Not available	Chubarenko (2020)	1 fragment (2 cm × 2 cm × 0.5 mm)	Fragment	24 hours	Thickness of the fragment assumed (cut from single-use beverage cups): 0.5 mm.
F-PP-07	PP	MS	1.71141e-06	50	0	0.000112294	0	30	0.00513409	0.00513409	0	Not available	Zha (2023)	25 sheets (4 mm × 4 mm × 0.5 mm)	Sheet	30 days	Thickness of the fragment assumed (cut from disposable deli containers): 0.5 mm. GPs: 11.67 million/g in 0.15 g (0.76524 μm).
F-PP-08	PP	UV+MS	4.84873e-06	50	4.99	0.000112294	0	30	0.0145451	0.0145451	0	Not available	Zha (2023)	25 sheets (4 mm × 4 mm × 0.5 mm)	Sheet	30 days	Thickness of the fragment assumed (cut from disposable deli containers): 0.5 mm. GPs: 96.34 million/g in 0.15 g (0.53576 μm).
F-PP-09	PP	UV+MS	4.92416e-06	15	1.65	0.000251523	25000	540	0.265551	0.265551	0	Not available	Reineccius (2023)	55.2 pellets (d = 4 mm)	Sphere	18 months	Mass of GPs = 0.00447 g. PP pellets have a diameter of 4 mm and a density of 0.910 g/cm3. At first, 100 pellets were added to each flask, while 5 pellets were taken from each flask after exposure of 1, 2, 3, 4, 6 weeks and 2, 3, 4, 6, 9, 12, 15 months (equals to 55.2 pellets exposed from beginning to end).	Uses the data from the "Baltic Sea" scenario in order to be consistent (across the five polymers)!
D-PP-01	PP	UV	0.000439066	18.1231	11.17	0	0	60	2.6	2.6	0	Not available	Song (2017)	10 pellets (V = 19 mm3)	Sphere	2 months	2-month MA following 0 d and 60 d UV exposure has led to the same weight loss (DEGR) of plastics. Mass loss (0 d; 60 d): 1.6%, 4.2%.
D-PP-02	PP	UV	0.000279997	19486.8	1.776	0	0	365	9.715	9.93	0.215	Reported	Bhat (2024)	pellets (d = 3.079 μm)	Sphere	1 year	Aging in duplicates. Mass variation (outdoor; indoor): 18.52% and 1.34%; 0.39% and 0.04%.
D-PP-03	PP	MC	0.00133502	25	0	0	1239000000	40	5.2	5.2	0	Reported	Auta (2018)	particles (d = 2.4 mm)	Sphere	40 days	Weight loss for Bacillus sp.: 4.0%, for Rhodococcus sp.: 6.4% (take the average value).
D-PP-04	PP	MC	0.0009166	300	0	4.65094e-05	1504500000	40	3.6	3.6	0	Reported	Auta (2017)	particles (d = 200 μm)	Sphere	40 days	The grated plastic obtained was passed through a 250 μm sieve to screen large debris. Thus, we assume PP microplastics have a spherical shape and an average diameter of 200 μm.
D-PP-05	PP	MC	0.00101734	24	0	0	1239000000	140	13.275	13.275	0	Reported	Skariyachan (2018)	pellets (d = 2.5 mm)	Sphere	140 days	Weight loss is the average of eight values that corresponding to eight different isolates (refer to the paper for details).
D-PP-06	PP	MC	0.001738	44	0	0.000701839	177000000	90	14.48	17.52	3.04	Reported	Wichatham (2024)	3 fragments (1 cm × 1 cm × 0.5 mm)	Fragment	90 days	Thickness of the fragment assumed (cut from single-use beverage cups): 0.5 mm.
D-PP-07	PP	MC	0.00113204	400.267	0	0	10620000000	28	3.12	3.12	0	Not available	Jeon (2021)	1 film (15 cm × 15 cm × 0.05 mm)	Film	28 days	Thickness of the packaging film assumed: 0.05 mm. Weight loss (in triplicates): 3.11%, 3.77%, 2.47%.
D-PP-08	PP	MC	3.77554e-05	402.667	0	0.00199859	4000000	360	1.35	1.35	0	Not available	Aravinthan (2016)	1 film (1.5 cm × 1.5 cm × 0.05 mm)	Film	12 months
D-PP-09	PP	UV+MC	0.000761751	44	14	0	72	54	4.03	3.45	-0.58	Reported	Zhu (2020)	240 particles (d = 2.75 mm)	Cuboid	54 days	The value of SA:V is given in the article.
D-PP-10	PP	UV+MC	8.72135e-05	15	1.65	0.000251523	25000	540	4.60035	4.60035	0	Not available	Reineccius (2023)	40 pellets (d = 4 mm)	Sphere	18 months	Weight of the 40 pellets before and after exposure: 0.02610 g, 0.02483 g. Weight loss_FRAG see F-PP-06.
F-PS-01	PS	UV	2.42635e-09	6.06667	27.5	0	0	180	4.36743e-05	5.27178e-05	9.04348e-06	Reported	Song (2022)	1 block (5 cm × 3 cm × 0.4 cm)	Block	180 days	GPs: 2.60E+04 (1.6 μm) + 1.30E+07 (166 nm). GPs (control): 8.80E+02 (3.0 μm) + 5.80E+05 (201 nm).
F-PS-02	PS	UV	3.75154e-06	44	28.08	0	0	56	0.0210064	0.0296601	0.00865374	Reported	Lambert (2016)	1 sheet (1 cm × 1 cm × 0.5 mm)	Sheet	56 days	GPs: 1.26E+08 particles/ml (224 nm). GPs (control): 0.41E+08 particles/ml (216 nm). 20 ml water was added to the glass vial.
F-PS-03	PS	UV	0.000725411	28.5714	60	0	0	83.3333	5.866	5.884	0.018	Reported	Pfohl (2025)	1 powder layer (h = 0.7 mm)	Film	2000 hours	Assuming the length and width of the powder layer is much greater than its height (HIPS–PS+rubber).
F-PS-04	PS	MS	0.00702461	42	0	0.0197392	0	1	0.7	0.7	0	Not available	Chubarenko (2020)	1 fragment (2 cm × 2 cm × 0.5 mm)	Fragment	24 hours	Thickness of the fragment assumed (cut from disposable plates): 0.5 mm.
F-PS-05	PS	MS	0.000227441	670.667	0	0.00140368	0	30	0.68	0.68	0	Not available	Lv (2024)	films (1 cm × 1 cm × 0.03 mm)	Film	30 days	Same study & same setup regarding the mechanical stress but without bacterial inoculation.
F-PS-06	PS	UV+MS	7.9718e-07	17.1429	1.65	0.000220083	25000	540	0.0430385	0.0430385	0	Not available	Reineccius (2023)	55.2 pellets (d = 3.5 mm)	Pellet	18 months	Mass of GPs = 0.00056 g. PS pellets have a diameter of 3.5 mm and a density of 1.050 g/cm3. 55.2 pellets were exposed from beginning to end (the same as F-PP-06).
D-PS-01	PS	UV	8.47212e-05	29753	1.776	0	0	365	3.045	3.22	0.175	Reported	Bhat (2024)	fragments (3.361 μm)	Fragment	1 year	PS fragments have a rectangular shape (assume size = length = width = 3 × height). Aging in duplicates. Mass variation (outdoor; indoor): 3.36% and 3.08%; 0.06% and 0.29%.
D-PS-02	PS	UV	0.0002328	103.624	27.5	0	0	0.375	–	–	–	Accounted for	Ward (2019)	1 film (8 cm × 1.5 cm × 196 μm)	Film	9 hours	First-order DEGR rate calculated and directly provided by the authors: 9.7E-06 h-1.
D-PS-03	PS	UV	0.000696	358.726	27.5	0	0	0.5	–	–	–	Accounted for	Ward (2019)	1 film (8 cm × 1.5 cm × 56 μm)	Film	12 hours	First-order DEGR rate calculated and directly provided by the authors: 2.9E-05 h-1.
D-PS-04	PS	MC	0.00108411	670.667	0	0.00140368	159300000	30	3.2	3.2	0	Not available	Lv (2024)	films (1 cm × 1 cm × 0.03 mm)	Film	30 days	Weight loss for A. xenomutans: 4.5%, for H. titanicae: 1.9% (take the average value).
D-PS-05	PS	MC	0.00136073	50	0	0.000161704	9.8058e+08	30	4	4	0	Reported	Safdar (2024)	fragments (4 mm × 4 mm × 0.5 mm)	Fragment	30 days	Thickness of the fragment assumed (cut from disposable food plates): 0.5 mm.
D-PS-06	PS	MC	0.00074152	50	0	0.000161704	646050000	30	2.2	2.2	0	Reported	Safdar (2024)	fragments (4 mm × 4 mm × 0.5 mm)	Fragment	30 days	Thickness of the fragment assumed (cut from disposable food plates): 0.5 mm.
D-PS-07	PS	MC	0.00277939	50	0	0.000161704	1734600000	30	8	8	0	Reported	Safdar (2024)	fragments (4 mm × 4 mm × 0.5 mm)	Fragment	30 days	Thickness of the fragment assumed (cut from disposable food plates): 0.5 mm.
D-PS-08	PS	MC	0.00170697	300	0	4.65094e-05	1486800000	40	6.6	6.6	0	Reported	Auta (2017)	particles (d = 200 μm)	Sphere	40 days	We assume PS microplastics have a spherical shape and an average diameter of 200 μm (the same as D-PP-08). Weight loss for B. cereus: 7.4%, for B. gottheilii: 5.8% (take the average value).
D-PS-09	PS	UV+MC	1.87151e-05	17.1429	1.65	0.000220083	25000	540	1.00553	1.00553	0	Not available	Reineccius (2023)	40 pellets (d = 3.5 mm)	Sphere	18 months	Weight of the 40 pellets before and after exposure: 0.01812 g, 0.01793 g. Weight loss_FRAG see F-PS-02.
F-EPS-01	EPS	UV	0.00113798	17.2588	11.17	0	0	60	6.6	6.6	0	Not available	Song (2017)	10 pellets (V = 22 mm3)	Sphere	2 months	2-month MA following 0 d and 60 d UV exposure has led to the same weight loss (FRAG) of plastics. Mass loss (0 d; 60 d): 5.4%, 12%.
F-EPS-02	EPS	UV	0.000212179	2.13333	9.625	0	0	371	7.57	7.57	0	Not available	Song (2020)	1 block (3 cm × 3 cm × 2.5 cm)	Block	371 days
F-EPS-03	EPS	MS	0.000925212	17.2588	0	0.030626	0	60	5.4	5.4	0	Not available	Song (2017)	10 pellets (V = 22 mm3)	Sphere	2 months	2-month MA following 0 d and 60 d UV exposure has led to the same weight loss (FRAG) of plastics. Mass loss (0 d; 60 d): 5.4%, 12%.
F-EPS-04	EPS	MS	0.0618754	3	0	0.0592176	0	1	6	6	0	Not available	Chubarenko (2020)	1 block (2 cm × 2 cm × 2 cm)	Block	24 hours		This studys uses sand from beach sediments; however, the microbial concentration is ignored for now!
F-EPS-05	EPS	MS	3.33014e-06	30	0	0.000112294	0	30	0.00998992	0.00998992	0	Not available	Zha (2023)	25 sheets (4 mm × 4 mm × 1 mm)	Sheet	30 days	Thickness of the fragment assumed (cut from disposable food containers): 1 mm. GPs: 42.22 million/g in 0.025 g (1.42476 μm).
F-EPS-06	EPS	UV+MS	1.87027e-05	30	4.99	0.000112294	0	10	0.018701	0.018701	0	Not available	Zha (2023)	25 sheets (4 mm × 4 mm × 1 mm)	Sheet	10 days	Thickness of the fragment assumed (cut from disposable food containers): 1 mm. GPs: 122.38 million/g in 0.025 g (1.23153 μm).
D-EPS-01	EPS	UV	0.00743812	17.2588	11.17	0	0	60	36	36	0	Not available	Song (2017)	10 pellets (V = 22 mm3)	Sphere	2 months	2-month MA following 0 d and 60 d UV exposure has led to the same weight loss (FRAG) of plastics. Mass loss (0 d; 60 d): 17%, 53%.
D-EPS-02	EPS	UV	0.000280698	2.13333	9.625	0	0	371	9.89	9.89	0	Not available	Song (2020)	1 block (3 cm × 3 cm × 2.5 cm)	Block	371 days
D-EPS-03	EPS	UV+MC	0.00134988	12	14	0	40	54	7.03	5.4	-1.63	Reported	Zhu (2020)	240 cuboids (size = 3.32 mm)	Cuboid	54 days	The value of SA:V is given in the article.
F-PET-01	PET	UV+MS	9.75042e-08	18.4615	1.65	0.000204362	25000	540	0.00526509	0.00526509	0	Not available	Reineccius (2023)	55.2 pellets (d = 3.25 mm)	Sphere	18 months	Mass of GPs = 0.00007 g. PET pellets have a diameter of 3.25 mm and a density of 1.340 g/cm3. 55.2 pellets were exposed from beginning to end (the same as F-PP-06).
D-PET-01	PET	UV	3.15508e-05	28368.8	1.776	0	0	365	1.145	1.545	0.4	Reported	Bhat (2024)	fragments (3.525 μm)	Fragment	1 year	PET fragments have a rectangular shape (assume size = length = width = 3 × height). Aging in duplicates. Mass variation (outdoor; indoor): 1.58% and 1.51%; 0.04% and 0.76%.
D-PET-02	PET	UV	0.00692911	4014.86	65	0	0	291	86.6862	–	–	Accounted for	Sait (2021)	fibers (l = 1.346 mm, d = 0.01 mm)	Fiber	291 days	We assume the change in the fibers's weight equals that of their length, and the fibers' diameter is 0.01 mm. Length (black PET, μm, original, control, exposed): 1303, 1248, 103.2; length (white PET, …): 1388, 1206, 19.07. Take the average value.
D-PET-03	PET	MC	0.00101531	76.6667	0	0.000323407	748710000	30	3	3	0	Reported	Safdar (2024)	fragments (4 mm × 4 mm × 0.3 mm)	Fragment	30 days	Thickness of the fragment assumed (cut from single-use water bottles): 0.3 mm.
D-PET-04	PET	MC	0.000673424	76.6667	0	0.000323407	205320000	30	2	2	0	Reported	Safdar (2024)	fragments (4 mm × 4 mm × 0.3 mm)	Fragment	30 days	Thickness of the fragment assumed (cut from single-use water bottles): 0.3 mm.
D-PET-05	PET	MC	0.00156972	76.6667	0	0.000323407	1354050000	30	4.6	4.6	0	Reported	Safdar (2024)	fragments (4 mm × 4 mm × 0.3 mm)	Fragment	30 days	Thickness of the fragment assumed (cut from single-use water bottles): 0.3 mm.
D-PET-06	PET	MC	0.00122976	300	0	4.65094e-05	1150500000	40	4.8	4.8	0	Reported	Auta (2017)	particles (d = 200 μm)	Sphere	40 days	We assume PET microplastics have a spherical shape and an average diameter of 200 μm (the same as D-PP-08). Weight loss for B. cereus: 6.6%, for B. gottheilii: 3.0% (take the average value).
D-PET-07	PET	MC	0.000179215	30	0	0	349000000000	90	1.6	18	16.4	Reported	Auta (2022)	particles (d = 2 mm)	Sphere	90 days	The PET microplastics obtained by grating has a size larger than 1.8 mm but smaller than 2 mm. We assume these microplastics have a spherical shape and an average diameter of 2 mm.
D-PET-08	PET	UV+MC	0.0084717	4014.86	65	0	250000	291	91.5014	–	–	Accounted for	Sait (2021)	fibers (l = 1.346 mm, d = 0.01 mm)	Fiber	291 days	We assume the change in the fibers's weight equals that of their length, and the fibers' diameter is 0.01 mm. Length (black PET, μm, original, control, exposed): 1303, 1387, 93.69; length (white PET, …): 1388, 1205, 42.60. Take the average value.
D-PET-09	PET	UV+MC	5.77597e-05	18.4615	1.65	0.000204362	25000	540	3.07088	3.07088	0	Not available	Reineccius (2023)	55.2 pellets (d = 3.25 mm)	Sphere	18 months	Weight of the 40 pellets before and after exposure: 0.01983 g, 0.01922 g. Weight loss_FRAG see F-PET-01.
F-HDPE-01	HDPE	UV+MS	2.09672e-07	15	1.65	0.000251523	25000	540	0.0113216	0.0113216	0	Not available	Reineccius (2023)	55.2 pellets (d = 4.0 mm)	Sphere	18 months	Mass of GPs = 0.00020 g. PE pellets have a diameter of 4 mm and a density of 0.955 g/cm3. 55.2 pellets were exposed from beginning to end (the same as F-PP-06).
D-HDPE-01	HDPE	UV	2.69817e-05	13544	1.776	0	0	365	0.98	2.37	1.39	Reported	Bhat (2024)	pellets (d = 4.430 μm)	Sphere	1 year	Aging in duplicates. Mass variation (outdoor; indoor): 3.53% and 1.21%; 1.67% and 1.11%.
D-HDPE-02	HDPE	MC	0.00107523	24	0	0	1239000000	140	13.975	13.975	0	Reported	Skariyachan (2018)	pellets (d = 2.5 mm)	Sphere	140 days	Weight loss is the average of eight values that corresponding to eight different isolates (refer to the paper for details).
D-HDPE-03	HDPE	MC	0.000210877	402	0	0.00909583	300000000	90	1.88	1.88	0	Reported	Sharma (2024)	films (2 cm × 2 cm × 0.05 mm)	Film	90 days	Thickness of the film assumed: 0.05 mm.
D-HDPE-04	HDPE	MC	0.000329276	402	0	0.00909583	400000000	90	2.92	2.92	0	Reported	Sharma (2024)	films (2 cm × 2 cm × 0.05 mm)	Film	90 days	Thickness of the film assumed: 0.05 mm.
D-HDPE-05	HDPE	MC	0.000143953	2004	0	0.000319775	1770000000	60	0.86	0.86	0	Not available	Kumari (2019)	films (1 cm × 1 cm × 0.01 mm)	Film	60 days		UV pretreatment (20 min)
D-HDPE-06	HDPE	UV+MC	5.8822e-05	15	1.65	0.000251523	25000	540	3.12647	3.12647	0	Not available	Reineccius (2023)	55.2 pellets (d = 4.0 mm)	Sphere	18 months	Weight of the 40 pellets before and after exposure: 0.02199 g, 0.02130 g. Weight loss_FRAG see F-PE-01.
D-HDPE-07	HDPE	UV+MC	5.74966e-05	36	14	0	32	54	0.31	0.45	0.14	Reported	Zhu (2020)	240 cuboids (size = 3.08 mm)	Cuboid	54 days	The value of SA:V is given in the article.
F-LDPE-01	LDPE	UV	1.29089e-09	5.23333	27.5	0	0	180	2.3236e-05	2.68e-05	3.56402e-06	Reported	Song (2022)	1 block (5 cm × 3 cm × 0.48 cm)	Block	180 days	GPs: 9.00E+03 (2.2 μm) + 5.40E+06 (154 nm). GPs (control): 2.40E+03 (1.5 μm) + 8.70E+05 (178 nm).
F-LDPE-02	LDPE	UV	0.000331045	28.5714	60	0	0	83.3333	2.721	2.723	0.002	Reported	Pfohl (2025)	1 powder layer (h = 0.7 mm)	Film	2000 hours	Assuming the length and width of the powder layer is much greater than its height.
D-LDPE-01	LDPE	UV	0.000114268	13006.7	1.776	0	0	365	4.085	7.565	3.48	Reported	Bhat (2024)	pellets (d = 4.613 μm)	Sphere	1 year	Aging in duplicates. Mass variation (outdoor; indoor): 3.19% and 11.94%; 0.42% and 6.54%.
D-LDPE-02	LDPE	MC	0.00110956	24	0	0	1239000000	140	14.3875	14.3875	0	Reported	Skariyachan (2018)	pellets (d = 2.5 mm)	Sphere	140 days	Weight loss is the average of eight values that corresponding to eight different isolates (refer to the paper for details).
D-LDPE-03	LDPE	MC	0.00224029	177.515	0	3.21949e-05	5500000000	30	6.5	6.5	0	Not available	Rad (2022)	particles (d = 338 μm)	Sphere	1 month	Size of grounded LDPE pieces: 250~425 μm (assuming spherical shape).
D-LDPE-04	LDPE	MC	0.000692729	2503.33	0	0.0013324	1720440000	56	3.805	4.785	0.98	Reported	Hou (2022)	sheets (1.5 cm × 1 cm × 0.008 mm)	Sheet	8 weeks	Weight loss for P. knackmussii: 5.95%, for P. aeruginosa: 3.62% (take the average value).
D-LDPE-05	LDPE	MC	0.00112015	401.333	0	0.0204656	8000000000	60	6.5	–	–	Accounted for	Gupta (2020)	films (3 cm × 3 cm × 0.05 mm)	Film	60 days	Thickness of the film assumed: 0.05 mm.
D-LDPE-06	LDPE	MC	0.00151699	401.333	0	0.0204656	8300000000	60	8.7	–	–	Accounted for	Gupta (2020)	films (3 cm × 3 cm × 0.05 mm)	Film	60 days	Thickness of the film assumed: 0.05 mm.
D-LDPE-07	LDPE	MC	0.00222247	1001.33	0	0	2725800000	30	6.45	6.58	0.13	Reported	Kavitha (2021)	films (3 cm × 3 cm × 0.02 mm)	Film	30 days	Weight loss for Bacillus sp. strain PE3: 6.68%, for Bacillus sp. strain PE2: 6.48% (take the average value).
D-LDPE-08	LDPE	MC	0.00279206	400.267	0	0	9735000000	28	7.52	7.52	0	Reported	Jeon (2021)	1 film (15 cm × 15 cm × 0.05 mm)	Film	28 days	Thickness of the packaging film assumed: 0.05 mm. Weight loss (in triplicates): 6.51%, 7.95%, 8.11%.
D-PE-01	PE	UV	1.26318e-05	14851.5	1.776	0	0	365	0.46	0.74	0.28	Reported	Bhat (2024)	pellets (d = 4.040 μm)	Sphere	1 year	Aging in duplicates. Mass variation (outdoor; indoor): 0.69% and 0.79%; 0.3% and 0.26%.
D-PE-02	PE	MC	0.00581178	1010	0	0.000161704	2548800000	30	16	16	0	Reported	Safdar (2024)	fragments (4 mm × 4 mm × 0.02 mm)	Film	30 days	Thickness of the fragment assumed (cut from shopping bags): 0.02 mm.
D-PE-03	PE	MC	0.00170978	1010	0	0.000161704	893850000	30	5	5	0	Reported	Safdar (2024)	fragments (4 mm × 4 mm × 0.02 mm)	Film	30 days	Thickness of the fragment assumed (cut from shopping bags): 0.02 mm.
D-PE-04	PE	MC	0.00206251	1010	0	0.000161704	1097400000	30	6	6	0	Reported	Safdar (2024)	fragments (4 mm × 4 mm × 0.02 mm)	Film	30 days	Thickness of the fragment assumed (cut from shopping bags): 0.02 mm.
D-PE-05	PE	MC	0.000994522	800	0	1.7441e-05	1239000000	40	3.9	3.9	0	Reported	Auta (2017)	powder (d = 75 μm)	Sphere	40 days	We assume PE powder have a spherical shape. Weight loss for B. cereus: 1.6%, for B. gottheilii: 6.2% (take the average value).
D-PE-06	PE	MC	0.000792427	800	0	1.9844e-05	267270000	40	3.12	5.01	1.89	Reported	He (2025)	particles (d = 75 μm)	Sphere	40 days	We assume PE particles have a spherical shape. Weight loss calculated by taking the average value for the four strains.
D-PE-07	PE	UV+MC	0.000102133	33	14	0	72	54	0.55	0.3	-0.25	Reported	Zhu (2020)	240 granules (d = 2 mm)	Sphere	54 days	The value of SA:V is given in the article.
F-PVC-01	PVC	UV+MS	2.50298e-07	15	1.65	0.000251523	25000	540	0.0135152	0.0135152	0	Not available	Reineccius (2023)	55.2 pellets (d = 4.0 mm)	Sphere	18 months	Mass of GPs = 0.00039 g. PVC pellets have a diameter of 4 mm and a density of 1.560 g/cm3. 55.2 pellets were exposed from beginning to end (the same as F-PP-06).
D-PVC-01	PVC	UV	0.501119	501	49.7359	0	0	0.0833333	4.09	4.09	0	Not available	Wang (2014)	1 film (4 cm × 4 cm × 0.04 mm)	Film	120 min		Original article written in Chinese
D-PVC-02	PVC	MC	0.00437494	177.515	0	3.21949e-05	2500000000	30	12.3	12.3	0	Not available	Rad (2022)	particles (d = 338 μm)	Sphere	1 month	Size of grounded PVC pieces: 250~425 μm (assuming spherical shape).
D-PVC-03	PVC	MC	5.67632e-05	104	0	0.00063955	1770000000	60	0.34	0.34	0	Not available	Kumari (2019)	films (1 cm × 1 cm × 0.2 mm)	Film	60 days		UV pretreatment (20 min)
D-PVC-04	PVC	UV+MC	6.05588e-05	15	1.65	0.000251523	25000	540	3.21728	3.21728	0	Not available	Reineccius (2023)	55.2 pellets (d = 4.0 mm)	Sphere	18 months	Weight of the 40 pellets before and after exposure: 0.05169 g, 0.05002 g. Weight loss_FRAG see F-PVC-01.
D-PLA-01	PLA	MC	0.00216848	51.6667	0	0	6.30957e+06	60	12.2	73.5	61.3	Reported	Boonluksiri (2021)	sheets (3 cm × 2 cm × 0.4 mm)	Sheet	60 days	Biodegradation (%) calculated in terms of CO2 production (still use weight loss still since organics were ignored). Soil burial condition.
D-PLA-02	PLA	MC	0.000979751	573.229	0	0.00394784	1.00475e+07	35	3.371	3.42	0.049	Reported	Mistry (2022)	films (2.5 cm × 2 cm × 0.035 mm)	Film	35 days	Weight loss for S. pavanii EA33: 4.02%, for N. zeae EA12: 2.82% (take the average value).
D-PLA-03	PLA	MC	0.000264362	573.229	0	0.00394784	200475	35	0.921	0.97	0.049	Reported	Mistry (2022)	films (2.5 cm × 2 cm × 0.035 mm)	Film	35 days	Weight loss for C. jiangningensis EA02: 1.41%, for G. desulfuricans EA63: 0.53% (take the average value).
D-PLA-04	PLA	MC	0.000959195	404	0	0.00454791	96465000	28	2.65	2.65	0	Reported	Yottakot (2019)	films (1 cm × 1 cm × 0.05 mm)	Film	4 weeks	Thickness of the film assumed: 0.05 mm (cut from the packaging of dairy products). Species: Streptomyces sp. KKU215.
F-PA-01	PA	UV	2.29767e-05	28.5714	60	0	0	83.3333	0.191289	0.191289	0	Not available	Pfohl (2022)	1 powder layer (h = 0.7 mm)	Film	2000 hours	PA-6. Released total mass: 2.235E-09 g, original mass: 4.655E-08 g, released DOC: 46.1 mg/g.
D-PA-01	PA	UV	0.0041611	4013.76	65	0	0	291	70.2065	–	–	Accounted for	Sait (2021)	fibers (l = 1.453 mm, d = 0.01 mm)	Fiber	291 days	PA-6. We assume the change in the fibers's weight equals that of their length, and the fibers' diameter is 0.01 mm. Length (original, control group, exposed group): 1453 μm, 1229 μm, 208.9 μm.
D-PA-02	PA	UV+MC	0.00424141	4013.76	65	0	250000	291	70.8947	–	–	Accounted for	Sait (2021)	fibers (l = 1.453 mm, d = 0.01 mm)	Fiber	291 days	PA-6. We assume the change in the fibers's weight equals that of their length, and the fibers' diameter is 0.01 mm. Length (original, control group, exposed group): 1453 μm, 1191 μm, 160.9 μm.
F-PU-01	PU	UV	4.49641e-05	28.5714	60	0	0	83.3333	0.374	0.406	0.032	Reported	Pfohl (2025)	1 powder layer (h = 0.7 mm)	Film	2000 hours	TPU_ether_arom. Assuming the length and width of the powder layer is much greater than its height.
F-PU-02	PU	UV	1.41829e-05	28.5714	60	0	0	83.3333	0.118121	0.118121	0	Not available	Pfohl (2022)	1 powder layer (h = 0.7 mm)	Film	2000 hours	TPU_ether_arom. Released total mass: 1.465E-07 g, original mass: 8.730E-06 g, released DOC: 15.6 mg/g.
Abbreviations and their meanings: DEGR: degradation, D.P.I.: data point index, Exposure_CA: exposure duration reported in the corresponding article, FRAG: fragmentation, GPs: generated particles, MC: microbes, MS: mechanical stress, R.E.S.: related environmental stress, SA:V: surface area to volume ratio, UV: ultraviolet, WL: weight loss.
Notes: 1. UV-A accounts for approximately 95% of the UV radiation that reaches the Earth's surface and UV-B accounts for the remaining 5%. I_j is equivalent to UVe, as defined in Supporting Information 1. 2. Regarding the column "Info on control": Reported–Values of the control groups are given in the article; Not available–No appropriate control groups are set or information on the weight loss i…

## Sheet: Scatterplot
Comparison of modeled rate constants with original data points (grouped by polymer type)
a_i	delta_i	b_i	alpha_i	c_i	beta_i	PP		a_i	delta_i	b_i	alpha_i	c_i	beta_i	PS
4.65659e-06	2.25917	0.000534127	5e-13	8.67563	1.43633			0.00722963	3.90386	3.26878e-10	0.549757	55.7464	4.94685
x_i	tau_i	y_i	theta_i	z_i	eta_i			x_i	tau_i	y_i	theta_i	z_i	eta_i
0.00549819	0.0137208	0.0172452	0.705493	1.61585e-05	0.442109			0.000273254	0.243292	0.014447	1.00907	6.23305e-05	0.496037
D.P.I.	R.E.S.	k_model [d-1]	k [i,j] [d-1]	s [cm-1]	I_j [W/m2]	P_j [mW]	C_j [CFU/ml]	D.P.I.	R.E.S.	k_model [d-1]	k [i,j] [d-1]	s [cm-1]	I_j [W/m2]	P_j [mW]	C_j [CFU/ml]
F-PP-01	UV	1.7309e-06	5.02264e-05	18.1231	11.17	0	0	F-PS-01	UV	1.6646e-08	2.42635e-09	6.06667	27.5	0	0
F-PP-02	UV	1.1757e-07	2.20232e-08	5.51111	27.5	0	0	F-PS-02	UV	3.85097e-05	3.75154e-06	44	28.08	0	0
F-PP-03	UV	2.60918e-06	4.89775e-07	21.7333	27.5	0	0	F-PS-03	UV	1.08343e-05	0.000725411	28.5714	60	0	0
F-PP-04	MS	0.000163487	5.00752e-05	18.1231	0	0.0277744	0	F-PS-04	MS	0.00323227	0.00702461	42	0	0.0197392	0
F-PP-05	MS	0.00737811	0.046846	21.7333	0	0.296088	0	F-PS-05	MS	0.00033694	0.000227441	670.667	0	0.00140368	0
F-PP-06	MS	0.000247005	4.00008e-05	42	0	0.0098696	0	F-PS-06	UV+MS	2.04526e-07	7.9718e-07	17.1429	1.65	0.000220083	25000
F-PP-07	MS	5.91049e-07	1.71141e-06	50	0	0.000112294	0	D-PS-01	UV	8.63824e-05	8.47212e-05	29753	1.776	0	0
F-PP-08	UV+MS	1.77294e-05	4.84873e-06	50	4.99	0.000112294	0	D-PS-02	UV	0.000346004	0.0002328	103.624	27.5	0	0
F-PP-09	UV+MS	1.253e-06	4.92416e-06	15	1.65	0.000251523	25000	D-PS-03	UV	0.000468047	0.000696	358.726	27.5	0	0
D-PP-01	UV	0.000541436	0.000439066	18.1231	11.17	0	0	D-PS-04	MC	0.000971708	0.00108411	670.667	0	0.00140368	159300000
D-PP-02	UV	0.000162827	0.000279997	19486.8	1.776	0	0	D-PS-05	MC	0.00127268	0.00136073	50	0	0.000161704	9.8058e+08
D-PP-03	MC	0.000972598	0.00133502	25	0	0	1239000000	D-PS-06	MC	0.00103474	0.00074152	50	0	0.000161704	646050000
D-PP-04	MC	0.00109653	0.0009166	300	0	4.65094e-05	1504500000	D-PS-07	MC	0.00168887	0.00277939	50	0	0.000161704	1734600000
D-PP-05	MC	0.000972053	0.00101734	24	0	0	1239000000	D-PS-08	MC	0.0024194	0.00170697	300	0	4.65094e-05	1486800000
D-PP-06	MC	0.000414645	0.001738	44	0	0.000701839	177000000	D-PS-09	UV+MC	1.82278e-05	1.87151e-05	17.1429	1.65	0.000220083	25000
D-PP-07	MC	0.00261198	0.00113204	400.267	0	0	10620000000
D-PP-08	MC	8.00194e-05	3.77554e-05	402.667	0	0.00199859	4000000
D-PP-09	UV+MC	0.000643342	0.000761751	44	14	0	72
D-PP-10	UV+MC	0.000148219	8.72135e-05	15	1.65	0.000251523	25000
a_i	delta_i	b_i	alpha_i	c_i	beta_i	PET		a_i	delta_i	b_i	alpha_i	c_i	beta_i	PE
N/A	N/A	N/A	N/A	N/A	N/A			N/A	N/A	N/A	N/A	N/A	N/A
x_i	tau_i	y_i	theta_i	z_i	eta_i			x_i	tau_i	y_i	theta_i	z_i	eta_i
0.000243276	0.790976	1.3262e-05	1.8763	0.0152179	0.0784619			4.72183e-09	1.34765	0.000367842	4.98976	5.33151e-05	0.65085
D.P.I.	R.E.S.	k_model [d-1]	k [i,j] [d-1]	s [cm-1]	I_j [W/m2]	P_j [mW]	C_j [CFU/ml]	D.P.I.	R.E.S.	k_model [d-1]	k [i,j] [d-1]	s [cm-1]	I_j [W/m2]	P_j [mW]	C_j [CFU/ml]
D-PET-01	UV	3.15375e-05	3.15508e-05	28368.8	1.776	0	0	D-PE-01	UV	1.27793e-05	1.26318e-05	14851.5	1.776	0	0
D-PET-02	UV	0.00576364	0.00692911	4014.86	65	0	0	D-PE-02	MC	0.00373114	0.00581178	1010	0	0.000161704	2548800000
D-PET-03	MC	0.000569414	0.00101531	76.6667	0	0.000323407	748710000	D-PE-03	MC	0.00188651	0.00170978	1010	0	0.000161704	893850000
D-PET-04	MC	0.000514449	0.000673424	76.6667	0	0.000323407	205320000	D-PE-04	MC	0.002156	0.00206251	1010	0	0.000161704	1097400000
D-PET-05	MC	0.000596511	0.00156972	76.6667	0	0.000323407	1354050000	D-PE-05	MC	0.00170423	0.000994522	800	0	1.7441e-05	1239000000
D-PET-06	MC	0.00173273	0.00122976	300	0	4.65094e-05	1150500000	D-PE-06	MC	0.000628036	0.000792427	800	0	1.9844e-05	267270000
D-PET-07	MC	0.00043903	0.000179215	30	0	0	349000000000	D-PE-07	UV+MC	0.000101182	0.000102133	33	14	0	72
D-PET-08	UV+MC	0.0127203	0.0084717	4014.86	65	0	250000
D-PET-09	UV+MC	8.23284e-05	5.77597e-05	18.4615	1.65	0.000204362	25000
a_i	delta_i	b_i	alpha_i	c_i	beta_i	HDPE		a_i	delta_i	b_i	alpha_i	c_i	beta_i	LDPE
x_i	tau_i	y_i	theta_i	z_i	eta_i			x_i	tau_i	y_i	theta_i	z_i	eta_i
0.0102628	3.35841e-11	0.00218253	0.299049	0.000378032	0.216488			0.0110506	5e-13	0.0103146	0.00436202	0.000104755	0.32406
D.P.I.	R.E.S.	k_model [d-1]	k [i,j] [d-1]	s [cm-1]	I_j [W/m2]	P_j [mW]	C_j [CFU/ml]	D.P.I.	R.E.S.	k_model [d-1]	k [i,j] [d-1]	s [cm-1]	I_j [W/m2]	P_j [mW]	C_j [CFU/ml]
D-HDPE-01	UV	2.65962e-05	2.69817e-05	13544	1.776	0	0	D-LDPE-01	UV	0.000114268	0.000114268	13006.7	1.776	0	0
D-HDPE-02	MC	0.000360854	0.00107523	24	0	0	1239000000	D-LDPE-02	MC	0.00102391	0.00110956	24	0	0	1239000000
D-HDPE-03	MC	0.000265452	0.000210877	402	0	0.00909583	300000000	D-LDPE-03	MC	0.00165967	0.00224029	177.515	0	3.21949e-05	5500000000
D-HDPE-04	MC	0.00028251	0.000329276	402	0	0.00909583	400000000	D-LDPE-04	MC	0.00113883	0.000692729	2503.33	0	0.0013324	1720440000
D-HDPE-05	MC	0.000389821	0.000143953	2004	0	0.000319775	1770000000	D-LDPE-05	MC	0.00187394	0.00112015	401.333	0	0.0204656	8000000000
D-HDPE-06	UV+MC	6.07623e-05	5.8822e-05	15	1.65	0.000251523	25000	D-LDPE-06	MC	0.00189643	0.00151699	401.333	0	0.0204656	8300000000
D-HDPE-07	UV+MC	5.75298e-05	5.74966e-05	36	14	0	32	D-LDPE-07	MC	0.00132198	0.00222247	1001.33	0	0	2725800000
								D-LDPE-08	MC	0.00199701	0.00279206	400.267	0	0	9735000000
a_i	delta_i	b_i	alpha_i	c_i	beta_i	EPS
0.0290164	9.30393e-12	1.69763e-07	4.94176	19.9123	1.34463
x_i	tau_i	y_i	theta_i	z_i	eta_i
D.P.I.	Polymer	k_model [d-1]	k [i,j] [d-1]	s [cm-1]	I_j [W/m2]	P_j [mW]	C_j [CFU/ml]
F-EPS-01	UV	0.000744243	0.00113798	17.2588	11.17	0	0
F-EPS-02	UV	0.00035663	0.000212179	2.13333	9.625	0	0
F-EPS-03	MS	0.00532252	0.000925212	17.2588	0	0.030626	0
F-EPS-04	MS	0.0129171	0.0618754	3	0	0.0592176	0
F-EPS-05	MS	2.82461e-06	3.33014e-06	30	0	0.000112294	0
F-EPS-06	UV+MS	1.67028e-05	1.87027e-05	30	4.99	0.000112294	0

## Sheet: Uncertainty
Standard deviation and relative uncertainty for each model parameter
Process	Parameter	Fitted value	Standard deviation	Rel. uncertainty (%)	Process	Parameter	Fitted value	Standard deviation	Rel. uncertainty (%)
HDPE fragmentation	a_i				PET fragmentation	a_i
	delta_i					delta_i
	b_i					b_i
	alpha_i					alpha_i
	c_i					c_i
	beta_i					beta_i
HDPE degradation	x_i	0.0102628	0.000885226	0.0885226	PET degradation	x_i	0.000243276	0.000295248	0.0295248
	tau_i	3.35841e-11	0.180316	18.1791		tau_i	0.790976	0.193329	19.515
	y_i	0.00218253	0.00428386	0.428388		y_i	1.3262e-05	2.19604e-05	0.00219604
	theta_i	0.299049	0.565763	61.4206		theta_i	1.8763	0.223188	22.5996
	z_i	0.000378032	0.00108219	0.108219		z_i	0.0152179	4.40139e-06	0.000440139
	eta_i	0.216488	0.17416	17.5489		eta_i	0.0784619	0.0456848	4.57087
LDPE fragmentation	a_i				EPS fragmentation	a_i	0.0290164	0.0418348	4.18531
	delta_i					delta_i	9.30393e-12	0.544767	58.7799
	b_i					b_i	1.69763e-07	8.83421e-07	8.83421e-05
	alpha_i					alpha_i	4.94176	2.22583	1186.53
	c_i					c_i	19.9123	0.000133858	0.0133858
	beta_i					beta_i	1.34463	0.268929	27.3865
LDPE degradation	x_i	0.0110506	0.00570462	0.570467	EPS degradation	x_i
	tau_i	5e-13	0.109747	11.0079		tau_i
	y_i	0.0103146	0.00611229	0.611235		y_i
	theta_i	0.00436202	3.62111e-05	0.00362111		theta_i
	z_i	0.000104755	0.000444128	0.0444128		z_i
	eta_i	0.32406	0.192233	19.4023		eta_i
PE fragmentation	a_i				PVC fragmentation	a_i
	delta_i					delta_i
	b_i					b_i
	alpha_i					alpha_i
	c_i					c_i
	beta_i					beta_i
PE degradation	x_i	4.72183e-09	2.4777e-09	2.4777e-07	PVC degradation	x_i
	tau_i	1.34765	1.93144e-10	1.93144e-08		tau_i
	y_i	0.000367842	1.92139e-06	0.000192139		y_i
	theta_i	4.98976	1.13557e-09	1.13557e-07		theta_i
	z_i	5.33151e-05	1.32565e-05	0.00132565		z_i
	eta_i	0.65085	1.46199e-08	1.46199e-06		eta_i
PP fragmentation	a_i	4.65659e-06	1.85062e-05	0.00185062	PLA fragmentation	a_i
	delta_i	2.25917	1.23325	189.113		delta_i
	b_i	0.000534127	0.00153069	0.153069		b_i
	alpha_i	5e-13	0.901033	111.897		alpha_i
	c_i	8.67563	9.42383e-08	9.42383e-06		c_i
	beta_i	1.43633	0.366813	37.9504		beta_i
PP degradation	x_i	0.00549819	0.00509516	0.509519	PLA degradation	x_i
	tau_i	0.0137208	0.112167	11.2521		tau_i
	y_i	0.0172452	0.00162459	0.162459		y_i
	theta_i	0.705493	0.380472	39.4666		theta_i
	z_i	1.61585e-05	3.81475e-05	0.00381475		z_i
	eta_i	0.442109	0.111386	11.1732		eta_i
PS fragmentation	a_i	0.00722963	0.0122634	1.22639	PA fragmentation	a_i
	delta_i	3.90386	0.000454318	0.0454318		delta_i
	b_i	3.26878e-10	2.00163e-08	2.00163e-06		b_i
	alpha_i	0.549757	7.4226e-09	7.4226e-07		alpha_i
	c_i	55.7464	1.59041e-06	0.000159041		c_i
	beta_i	4.94685	0.000465276	0.0465276		beta_i
PS degradation	x_i	0.000273254	0.000200397	0.0200397	PA degradation	x_i
	tau_i	0.243292	0.0675505	6.76276		tau_i
	y_i	0.014447	4.38722e-06	0.000438722		y_i
	theta_i	1.00907	0.160044	16.1074		theta_i
	z_i	6.23305e-05	0.000176577	0.0176577		z_i
	eta_i	0.496037	0.122118	12.2575		eta_i
PET degradation	x_i	0.000243276	0.000295248	0.0295248	PA fragmentation	a_i
	tau_i	0.790976	0.193329	19.515		delta_i
	y_i	1.3262e-05	2.19604e-05	0.00219604		b_i
	theta_i	1.8763	0.223188	22.5996		alpha_i
	z_i	0.0152179	4.40139e-06	0.000440139		c_i
	eta_i	0.0784619	0.0456848	4.57087		beta_i
EPS fragmentation	a_i	0.0290164	0.0418348	4.18531	PA degradation	x_i
	delta_i	9.30393e-12	0.544767	58.7799		tau_i
	b_i	1.69763e-07	8.83421e-07	8.83421e-05		y_i
	alpha_i	4.94176	2.22583	1186.53		theta_i
	c_i	19.9123	0.000133858	0.0133858		z_i
	beta_i	1.34463	0.268929	27.3865		eta_i

## Sheet: Results
Modeled rate constants and estimated lifespans in different environmental compartments (grouped by polymer type)
Polymer (FRAG)	a_i	delta_i	b_i	alpha_i	c_i	beta_i
PP	4.65659e-06	2.25917	0.000534127	5e-13	8.67563	1.43633
PS	0.00722963	3.90386	3.26878e-10	0.549757	55.7464	4.94685
EPS	0.0290164	9.30393e-12	1.69763e-07	4.94176	19.9123	1.34463
Polymer (DEGR)	x_i	tau_i	y_i	theta_i	z_i	eta_i
PP	0.00549819	0.0137208	0.0172452	0.705493	1.61585e-05	0.442109
PS	0.000273254	0.243292	0.014447	1.00907	6.23305e-05	0.496037
PET	0.000243276	0.790976	1.3262e-05	1.8763	0.0152179	0.0784619
HDPE	0.0102628	3.35841e-11	0.00218253	0.299049	0.000378032	0.216488
LDPE	0.0110506	5e-13	0.0103146	0.00436202	0.000104755	0.32406
PE	4.72183e-09	1.34765	0.000367842	4.98976	5.33151e-05	0.65085
Plastic emission: Microwave-safe food containers without lids (height: 4 cm, diameter: 11 cm, thickness: 0.8 mm, product details: https://www.uline.ca/Product/Detail/S-24984/Take-Out-Containers/Deli-Containers-8-oz)
Polymer (i)	Compartment (j)	SA:V [cm-1]	I_j [W/m2]	P_j [mW]	C_j [CFU/ml]	kfrag [d-1]	kdegr [d-1]	tmacro [yr]	ttotal [yr]	kfrag_LL [d-1]	kfrag_UL [d-1]	kdegr_LL[d-1]	kdegr_UL[d-1]	tmacro_LL [yr]	tmacro_UL [yr]	ttotal_LL [yr]	ttotal_UL [yr]
PP	Air	25	10	0.0040425	0.5	2.48077e-05	0.000503062	35.8523	37.6203	1.13005e-08	3.09281	0.000213477	0.0030702	0.00611309	88.648	6.16422	88.6527
PP	Topsoil	25	0.1	0.00115331	670000000	7.08376e-06	0.00076065	24.6509	24.8805	7.51256e-09	1.04389	0.000144422	0.00690683	0.0180106	131.036	2.74009	131.042
PP	Subsoil	25	0	0	121000000	0	0.000347758	54.4211	54.4211	0	0	6.82903e-05	0.00254337	7.44106	277.131	7.44106	277.131
PP	Beach	25	12.5	0.0263614	12500000	0.000317293	0.000716222	18.3116	26.4239	5.7484e-08	15.4939	0.000328765	0.00429465	0.00122113	57.555	4.40673	57.565
PP	Water surface	25	10	0.0033	250000	1.94403e-05	0.000525603	34.7227	36.007	9.59116e-09	2.69786	0.000239109	0.00320788	0.00700663	79.1463	5.89964	79.1495
PP	Water column	25	0	1.6896e-06	38500	2.97662e-10	9.88729e-06	1914.05	1914.11	7.34448e-20	0.00335479	4.02163e-06	3.17865e-05	5.58835	4705.89	595.39	4705.89
PP	Sediment	25	0	0	482000	0	3.02225e-05	626.201	626.201	0	0	9.6101e-06	0.000119041	158.981	1969.32	158.981	1969.32
PS	Air	25	10	0.0040425	0.5	2.56939e-06	8.82378e-05	208.413	214.481	2.50145e-06	2.63873e-06	4.67407e-05	0.000211362	88.436	384.332	89.5401	404.901
PS	Topsoil	25	0.1	0.00115331	670000000	1.91368e-07	0.000890935	21.2376	21.2421	1.8645e-07	1.96543e-07	0.000104931	0.0141665	1.3359	180.04	1.33592	180.36
PS	Subsoil	25	0	0	121000000	0	0.000380833	49.6946	49.6946	0	0	5.22505e-05	0.00454411	4.16481	362.204	4.16481	362.204
PS	Beach	25	12.5	0.0263614	12500000	0.00178693	0.000233998	9.3647	80.8782	0.0017311	0.0018422	0.000106773	0.00119175	6.23788	10.2974	15.8804	177.248
PS	Water surface	25	10	0.0033	250000	2.46348e-06	0.000105951	174.564	178.623	2.39857e-06	2.53055e-06	6.09774e-05	0.000258815	72.415	298.62	73.123	310.367
PS	Water column	25	0	1.6896e-06	38500	3.22385e-24	7.01347e-06	2698.43	2698.43	3.01444e-24	3.43822e-24	2.34203e-06	2.9925e-05	632.427	8080.75	632.427	8080.75
PS	Sediment	25	0	0	482000	0	2.45684e-05	770.314	770.314	0	0	6.06623e-06	0.000136445	138.703	3119.79	138.703	3119.79
EPS	Air	25	10	0.0040425	0.5	0.000780392	N.A.	N.A.	N.A.	7.37266e-06	0.00780897	N.A.	N.A.	N.A.	N.A.	N.A.	N.A.
EPS	Topsoil	25	0.1	0.00115331	670000000	6.47397e-05	N.A.	N.A.	N.A.	1.04343e-07	0.00274585	N.A.	N.A.	N.A.	N.A.	N.A.	N.A.
EPS	Subsoil	25	0	0	121000000	0	N.A.	N.A.	N.A.	0	0	N.A.	N.A.	N.A.	N.A.	N.A.	N.A.
EPS	Beach	25	12.5	0.0263614	12500000	0.00564826	N.A.	N.A.	N.A.	0.000317389	0.0325416	N.A.	N.A.	N.A.	N.A.	N.A.	N.A.
EPS	Water surface	25	10	0.0033	250000	0.000696897	N.A.	N.A.	N.A.	5.74373e-06	0.0067972	N.A.	N.A.	N.A.	N.A.	N.A.	N.A.
EPS	Water column	25	0	1.6896e-06	38500	1.00063e-08	N.A.	N.A.	N.A.	2.9286e-14	1.33385e-05	N.A.	N.A.	N.A.	N.A.	N.A.	N.A.
EPS	Sediment	25	0	0	482000	0	N.A.	N.A.	N.A.	0	0	N.A.	N.A.	N.A.	N.A.	N.A.	N.A.
PET	Air	25	10	0.0040425	0.5	N.A.	4.78228e-05	N.A.	395.739	N.A.	N.A.	2.16815e-05	0.000176661	N.A.	N.A.	107.128	872.879
PET	Topsoil	25	0.1	0.00115331	670000000	N.A.	0.00023265	N.A.	81.3469	N.A.	N.A.	0.000102885	0.000774291	N.A.	N.A.	24.4422	183.947
PET	Subsoil	25	0	0	121000000	N.A.	0.000203415	N.A.	93.0384	N.A.	N.A.	9.01508e-05	0.000684315	N.A.	N.A.	27.6559	209.93
PET	Beach	25	12.5	0.0263614	12500000	N.A.	0.000174932	N.A.	108.187	N.A.	N.A.	7.88117e-05	0.000600444	N.A.	N.A.	31.5189	240.134
PET	Water surface	25	10	0.0033	250000	N.A.	0.00012833	N.A.	147.474	N.A.	N.A.	5.80377e-05	0.000425547	N.A.	N.A.	44.473	326.087
PET	Water column	25	0	1.6896e-06	38500	N.A.	0.000108137	N.A.	175.012	N.A.	N.A.	4.77051e-05	0.000333039	N.A.	N.A.	56.8262	396.715
PET	Sediment	25	0	0	482000	N.A.	0.000131854	N.A.	143.532	N.A.	N.A.	5.94764e-05	0.00043451	N.A.	N.A.	43.5556	318.2
HDPE	Air	25	10	0.0040425	0.5	N.A.	4.79326e-05	N.A.	394.832	N.A.	N.A.	3.14347e-05	0.000185149	N.A.	N.A.	102.217	602.053
HDPE	Topsoil	25	0.1	0.00115331	670000000	N.A.	0.000327136	N.A.	57.8516	N.A.	N.A.	9.80873e-05	0.00196338	N.A.	N.A.	9.63915	192.944
HDPE	Subsoil	25	0	0	121000000	N.A.	0.00021808	N.A.	86.7815	N.A.	N.A.	6.7298e-05	0.00110945	N.A.	N.A.	17.0583	281.217
HDPE	Beach	25	12.5	0.0263614	12500000	N.A.	0.00018108	N.A.	104.514	N.A.	N.A.	9.19343e-05	0.000657095	N.A.	N.A.	28.8016	205.857
HDPE	Water surface	25	10	0.0033	250000	N.A.	0.000101792	N.A.	185.923	N.A.	N.A.	6.39736e-05	0.000298776	N.A.	N.A.	63.343	295.831
HDPE	Water column	25	0	1.6896e-06	38500	N.A.	3.81495e-05	N.A.	496.084	N.A.	N.A.	1.98942e-05	9.90979e-05	N.A.	N.A.	190.976	951.299
HDPE	Sediment	25	0	0	482000	N.A.	6.5933e-05	N.A.	287.039	N.A.	N.A.	2.88246e-05	0.000201059	N.A.	N.A.	94.1282	656.571
LDPE	Air	25	10	0.0040425	0.5	N.A.	0.000116057	N.A.	163.069	N.A.	N.A.	0.000114149	0.000117956	N.A.	N.A.	160.444	165.795
LDPE	Topsoil	25	0.1	0.00115331	670000000	N.A.	0.000951795	N.A.	19.8839	N.A.	N.A.	0.000217209	0.018155	N.A.	N.A.	1.04243	87.1298
LDPE	Subsoil	25	0	0	121000000	N.A.	0.0004818	N.A.	39.2805	N.A.	N.A.	7.13522e-05	0.00743929	N.A.	N.A.	2.54397	265.238
LDPE	Beach	25	12.5	0.0263614	12500000	N.A.	0.000346124	N.A.	54.678	N.A.	N.A.	0.000159344	0.00257748	N.A.	N.A.	7.34258	118.771
LDPE	Water surface	25	10	0.0033	250000	N.A.	0.000180118	N.A.	105.072	N.A.	N.A.	0.000132875	0.00051776	N.A.	N.A.	36.5524	142.43
LDPE	Water column	25	0	1.6896e-06	38500	N.A.	3.54426e-05	N.A.	533.973	N.A.	N.A.	1.23572e-05	0.000176555	N.A.	N.A.	107.192	1531.52
LDPE	Sediment	25	0	0	482000	N.A.	8.03912e-05	N.A.	235.416	N.A.	N.A.	2.09973e-05	0.000526683	N.A.	N.A.	35.9331	901.323
PE	Air	25	10	0.0040425	0.5	N.A.	1.29857e-05	N.A.	1457.4	N.A.	N.A.	1.29857e-05	1.29858e-05	N.A.	N.A.	1457.39	1457.4
PE	Topsoil	25	0.1	0.00115331	670000000	N.A.	1.0699e-05	N.A.	1768.89	N.A.	N.A.	1.06987e-05	1.06993e-05	N.A.	N.A.	1768.84	1768.93
PE	Subsoil	25	0	0	121000000	N.A.	3.51215e-06	N.A.	5388.53	N.A.	N.A.	3.51206e-06	3.51225e-06	N.A.	N.A.	5388.39	5388.67
PE	Beach	25	12.5	0.0263614	12500000	N.A.	4.03403e-05	N.A.	469.142	N.A.	N.A.	4.03402e-05	4.03405e-05	N.A.	N.A.	469.141	469.144
PE	Water surface	25	10	0.0033	250000	N.A.	1.30485e-05	N.A.	1450.38	N.A.	N.A.	1.30485e-05	1.30486e-05	N.A.	N.A.	1450.38	1450.39
PE	Water column	25	0	1.6896e-06	38500	N.A.	1.85925e-08	N.A.	1.0179e+06	N.A.	N.A.	1.85921e-08	1.8593e-08	N.A.	N.A.	1.01787e+06	1.01793e+06
PE	Sediment	25	0	0	482000	N.A.	9.63171e-08	N.A.	196490	N.A.	N.A.	9.63145e-08	9.63196e-08	N.A.	N.A.	196485	196495

## Sheet: Rate constants
Comparison of modeled rate constants among polymers and among environmental compartments (rate constants extracted from the "Results" spreadsheet)
Fragmentation					Degradation					Ratio of degradation rate constants between compartments
Polymer	Compartment	kfrag [d-1]	kfrag_LL [d-1]	kfrag_UL [d-1]	Polymer	Compartment	kdegr [d-1]	kdegr_LL[d-1]	kdegr_UL[d-1]	Ratio	PP	PS	PET	HDPE	LDPE	PE	Geom. Mean	Minimum	Maximum	No. Geom. > 1
PP	Air	2.48077e-05	1.13005e-08	3.09281	PP	Air	0.000503062	0.000213477	0.0030702	Air / TopS	0.661358	0.0990395	0.205557	0.146522	0.121935	1.21373	0.257566	0.0990395	1.21373	2
PP	TopS	7.08376e-06	7.51256e-09	1.04389	PP	TopS	0.00076065	0.000144422	0.00690683	Air / SubS	1.44659	0.231697	0.2351	0.219793	0.240883	3.69736	0.498928	0.219793	3.69736
PP	SubS	0	0	0	PP	SubS	0.000347758	6.82903e-05	0.00254337	Air / Beach	0.702382	0.377087	0.273379	0.264704	0.335306	0.321904	0.356959	0.264704	0.702382
PP	Beach	0.000317293	5.7484e-08	15.4939	PP	Beach	0.000716222	0.000328765	0.00429465	Air / WSur	0.957115	0.832814	0.372655	0.47089	0.64434	0.995186	0.669052	0.372655	0.995186
PP	WSur	1.94403e-05	9.59116e-09	2.69786	PP	WSur	0.000525603	0.000239109	0.00320788	Air / WCol	50.8797	12.5812	0.442242	1.25644	3.27452	698.437	9.66178	0.442242	698.437
PP	WCol	2.97662e-10	7.34448e-20	0.00335479	PP	WCol	9.88729e-06	4.02163e-06	3.17865e-05	Air / Sedm	16.6453	3.59152	0.362695	0.72699	1.44366	134.823	3.81192	0.362695	134.823
PP	Sedm	0	0	0	PP	Sedm	3.02225e-05	9.6101e-06	0.000119041	TopS / Air	1.51204	10.097	4.86483	6.82491	8.20108	0.823906	3.8825	0.823906	10.097	6
PS	Air	2.56939e-06	2.50145e-06	2.63873e-06	PS	Air	8.82378e-05	4.67407e-05	0.000211362	TopS / SubS	2.1873	2.33944	1.14372	1.50007	1.9755	3.04628	1.93709	1.14372	3.04628
PS	TopS	1.91368e-07	1.8645e-07	1.96543e-07	PS	TopS	0.000890935	0.000104931	0.0141665	TopS / Beach	1.06203	3.80744	1.32994	1.80658	2.74987	0.265219	1.38589	0.265219	3.80744
PS	SubS	0	0	0	PS	SubS	0.000380833	5.22505e-05	0.00454411	TopS / WSur	1.4472	8.40891	1.8129	3.21379	5.28428	0.81994	2.59759	0.81994	8.40891
PS	Beach	0.00178693	0.0017311	0.0018422	PS	Beach	0.000233998	0.000106773	0.00119175	TopS / WCol	76.9321	127.032	2.15143	8.57511	26.8546	575.446	37.5119	2.15143	575.446
PS	WSur	2.46348e-06	2.39857e-06	2.53055e-06	PS	WSur	0.000105951	6.09774e-05	0.000258815	TopS / Sedm	25.1683	36.2635	1.76445	4.96165	11.8395	111.081	14.7998	1.76445	111.081
PS	WCol	3.22385e-24	3.01444e-24	3.43822e-24	PS	WCol	7.01347e-06	2.34203e-06	2.9925e-05	SubS / Air	0.691282	4.31599	4.25351	4.54973	4.1514	0.270463	2.0043	0.270463	4.54973	4
PS	Sedm	0	0	0	PS	Sedm	2.45684e-05	6.06623e-06	0.000136445	SubS / TopS	0.457185	0.427453	0.874337	0.666635	0.506202	0.328269	0.516238	0.328269	0.874337
EPS	Air	0.000780392	7.37266e-06	0.00780897	PET	Air	4.78228e-05	2.16815e-05	0.000176661	SubS / Beach	0.485544	1.6275	1.16282	1.20433	1.39199	0.0870631	0.715451	0.0870631	1.6275
EPS	TopS	6.47397e-05	1.04343e-07	0.00274585	PET	TopS	0.00023265	0.000102885	0.000774291	SubS / WSur	0.661636	3.59442	1.58509	2.14242	2.67491	0.269161	1.34098	0.269161	3.59442
EPS	SubS	0	0	0	PET	SubS	0.000203415	9.01508e-05	0.000684315	SubS / WCol	35.1722	54.3002	1.88108	5.71647	13.5938	188.901	19.3651	1.88108	188.901
EPS	Beach	0.00564826	0.000317389	0.0325416	PET	Beach	0.000174932	7.88117e-05	0.000600444	SubS / Sedm	11.5066	15.501	1.54272	3.30761	5.9932	36.4645	7.64022	1.54272	36.4645
EPS	WSur	0.000696897	5.74373e-06	0.0067972	PET	WSur	0.00012833	5.80377e-05	0.000425547	Beach / Air	1.42373	2.65191	3.65792	3.77781	2.98235	3.10652	2.80144	1.42373	3.77781	5
EPS	WCol	1.00063e-08	2.9286e-14	1.33385e-05	PET	WCol	0.000108137	4.77051e-05	0.000333039	Beach / TopS	0.941593	0.262643	0.751911	0.553532	0.363654	3.77047	0.721557	0.262643	3.77047
EPS	Sedm	0	0	0	PET	Sedm	0.000131854	5.94764e-05	0.00043451	Beach / SubS	2.05955	0.614438	0.859979	0.830338	0.718397	11.4859	1.39772	0.614438	11.4859
PP (Geomean)		3.17503e-06			HDPE	Air	4.79326e-05	3.14347e-05	0.000185149	Beach / WSur	1.36267	2.20855	1.36314	1.77893	1.92165	3.09156	1.87431	1.36267	3.09156
PS (Geomean)		1.47484e-09			HDPE	TopS	0.000327136	9.80873e-05	0.00196338	Beach / WCol	72.4387	33.3641	1.61769	4.7466	9.76577	2169.7	27.0669	1.61769	2169.7
EPS (Geomean)		7.24049e-05			HDPE	SubS	0.00021808	6.7298e-05	0.00110945	Beach / Sedm	23.6983	9.52437	1.32671	2.74643	4.30549	418.828	10.6789	1.32671	418.828
					HDPE	Beach	0.00018108	9.19343e-05	0.000657095	WSur / Air	1.04481	1.20075	2.68345	2.12364	1.55198	1.00484	1.49465	1.00484	2.68345	3
					HDPE	WSur	0.000101792	6.39736e-05	0.000298776	WSur / TopS	0.690992	0.118921	0.551601	0.31116	0.18924	1.2196	0.384972	0.118921	1.2196
					HDPE	WCol	3.81495e-05	1.98942e-05	9.90979e-05	WSur / SubS	1.51141	0.278209	0.630879	0.466761	0.373844	3.71525	0.745725	0.278209	3.71525
					HDPE	Sedm	6.5933e-05	2.88246e-05	0.000201059	WSur / Beach	0.733854	0.452787	0.733599	0.562135	0.520386	0.323461	0.533529	0.323461	0.733854
					LDPE	Air	0.000116057	0.000114149	0.000117956	WSur / WCol	53.1594	15.1068	1.18673	2.66823	5.08197	701.815	14.441	1.18673	701.815
					LDPE	TopS	0.000951795	0.000217209	0.018155	WSur / Sedm	17.3911	4.31251	0.973273	1.54386	2.24052	135.475	5.6975	0.973273	135.475
					LDPE	SubS	0.0004818	7.13522e-05	0.00743929	WCol / Air	0.0196542	0.0794838	2.26121	0.795898	0.305389	0.00143177	0.103501	0.00143177	2.26121	0
					LDPE	Beach	0.000346124	0.000159344	0.00257748	WCol / TopS	0.0129985	0.00787203	0.464806	0.116617	0.0372376	0.00173778	0.0266582	0.00173778	0.464806
					LDPE	WSur	0.000180118	0.000132875	0.00051776	WCol / SubS	0.0284316	0.0184161	0.53161	0.174933	0.0735627	0.00529377	0.0516394	0.00529377	0.53161
					LDPE	WCol	3.54426e-05	1.23572e-05	0.000176555	WCol / Beach	0.0138048	0.0299723	0.618166	0.210677	0.102399	0.000460892	0.0369454	0.000460892	0.618166
					LDPE	Sedm	8.03912e-05	2.09973e-05	0.000526683	WCol / WSur	0.0188113	0.0661952	0.842649	0.37478	0.196774	0.00142488	0.0692472	0.00142488	0.842649
					PE	Air	1.29857e-05	1.29857e-05	1.29858e-05	WCol / Sedm	0.32715	0.285468	0.820127	0.57861	0.440876	0.193035	0.394537	0.193035	0.820127
					PE	TopS	1.0699e-05	1.06987e-05	1.06993e-05	Sedm / Air	0.0600771	0.278434	2.75714	1.37553	0.692686	0.00741716	0.262335	0.00741716	2.75714	1
					PE	SubS	3.51215e-06	3.51206e-06	3.51225e-06	Sedm / TopS	0.0397325	0.0275759	0.566749	0.201546	0.0844627	0.00900242	0.0675685	0.00900242	0.566749
					PE	Beach	4.03403e-05	4.03402e-05	4.03405e-05	Sedm / SubS	0.0869068	0.0645121	0.648204	0.302333	0.166856	0.0274239	0.130886	0.0274239	0.648204
					PE	WSur	1.30485e-05	1.30485e-05	1.30486e-05	Sedm / Beach	0.0421971	0.104994	0.753745	0.364109	0.232261	0.00238761	0.0936427	0.00238761	0.753745
					PE	WCol	1.85925e-08	1.85921e-08	1.8593e-08	Sedm / WSur	0.0575006	0.231884	1.02746	0.647725	0.446325	0.00738145	0.175515	0.00738145	1.02746
					PE	Sedm	9.63171e-08	9.63145e-08	9.63196e-08	Sedm / WCol	3.0567	3.50302	1.21932	1.72828	2.26821	5.18041	2.53462	1.21932	5.18041
					PP (GeoMean)		0.000204523			Ratio of fragmentation rate constants between compartments
					PS (GeoMean)		0.000103578			Ratio	PP	PS	EPS	Geom. Mean	Minimum	Maximum	No. Geom. > 1
					PET (GeoMean)		0.000132695			Air / TopS	3.50205	13.4265	12.0543	8.27577	3.50205	13.4265	3
					HDPE (GeoMean)		0.000106805			Air / Beach	0.0781854	0.00143788	0.138165	0.0249507	0.00143788	0.138165
					LDPE (GeoMean)		0.000191527			Air / WSur	1.2761	1.04299	1.11981	1.14227	1.04299	1.2761
					PE (GeoMean)		2.40099e-06			Air / WCol	83341.8	7.96995e+17	77990	1.73029e+09	77990	7.96995e+17
										TopS / Air	0.285547	0.0744798	0.082958	0.120835	0.0744798	0.285547	1
										TopS / Beach	0.0223256	0.000107093	0.0114619	0.0030149	0.000107093	0.0223256
										TopS / WSur	0.364386	0.0776817	0.0928971	0.138026	0.0776817	0.364386
										TopS / WCol	23798	5.936e+16	6469.89	2.09079e+08	6469.89	5.936e+16
										Beach / Air	12.7901	695.467	7.23772	40.0791	7.23772	695.467	4
										Beach / TopS	44.7916	9337.66	87.2457	331.685	44.7916	9337.66
										Beach / WSur	16.3214	725.366	8.10487	45.7812	8.10487	725.366
										Beach / WCol	1.06595e+06	5.54284e+20	564470	6.93485e+10	564470	5.54284e+20
										WSur / Air	0.783639	0.958782	0.893009	0.875448	0.783639	0.958782	2
										WSur / TopS	2.74434	12.873	10.7646	7.24501	2.74434	12.873
										WSur / Beach	0.0612691	0.00137862	0.123383	0.021843	0.00137862	0.123383
										WSur / WCol	65309.8	7.64144e+17	69645.8	1.51478e+09	65309.8	7.64144e+17
										WCol / Air	1.19988e-05	1.25471e-18	1.28222e-05	5.77937e-10	1.25471e-18	1.28222e-05	0
										WCol / TopS	4.20204e-05	1.68463e-17	0.000154562	4.78288e-09	1.68463e-17	0.000154562
										WCol / Beach	9.3813e-07	1.80413e-21	1.77157e-06	1.44199e-11	1.80413e-21	1.77157e-06
										WCol / WSur	1.53116e-05	1.30865e-18	1.43584e-05	6.60162e-10	1.30865e-18	1.53116e-05

## Sheet: Elena2023
Comparion of degradation rate constants computed by PlasticFADE with estimates provided by Corella-Puertas et al. (2023)
Polymer & Size & Shape	SA:V [cm-1]	I_j_WS [W/m2]	C_j_WS [CFU/ml]	I_j_WC [W/m2]	C_j_WC [CFU/ml]	k_fast [d-1]	k_medium [d-1]	k_slow [d-1]	k_WS [d-1]	k_WS_LL [d-1]	k_WS_UL [d-1]	k_WC [d-1]	k_WC_LL [d-1]	k_WC_UL [d-1]	k_fast [yr-1]	k_medium [yr-1]	k_slow [yr-1]
PP, 1000 μm, Sphere	60	10	250000	0	38500	0.000166575	2.70137e-05	4.38356e-06	0.000531954	0.0002403	0.00313192	1.00068e-05	3.97869e-06	3.19102e-05	0.0608	0.00986	0.0016
PP, 100 μm, Sphere	600	10	250000	0	38500	0.00166575	0.000270137	4.38356e-05	0.000549029	0.00025034	0.0030779	1.0328e-05	4.12386e-06	3.29476e-05	0.608	0.0986	0.016
PP, 10 μm, Sphere	6000	10	250000	0	38500	0.0166575	0.00270137	0.000438356	0.000566651	0.000259991	0.0032676	1.06595e-05	4.23134e-06	3.29818e-05	6.08	0.986	0.16
PS, 1000 μm, Sphere	60	10	250000	0	38500	2.19178e-05	6.93151e-07	2.19178e-08	0.000131102	7.50182e-05	0.000320836	8.67832e-06	2.83009e-06	3.70606e-05	0.008	0.000253	8e-06
PS, 100 μm, Sphere	600	10	250000	0	38500	0.000219178	6.93151e-06	2.19178e-07	0.000229563	0.000129514	0.000562543	1.51959e-05	4.83688e-06	6.55178e-05	0.08	0.00253	8e-05
PS, 10 μm, Sphere	6000	10	250000	0	38500	0.00219178	6.93151e-05	2.19178e-06	0.00040197	0.000221855	0.000980266	2.66085e-05	8.44181e-06	0.000112996	0.8	0.0253	0.0008
PET, 1000 μm, Sphere	60	10	250000	0	38500	0.00230137	7.09589e-06	2.19178e-08	0.000256488	9.31438e-05	0.00119797	0.000216129	7.79132e-05	0.000967541	0.84	0.00259	8e-06
PET, 100 μm, Sphere	600	10	250000	0	38500	0.0230137	7.09589e-05	2.19178e-07	0.00158505	0.000325455	0.017683	0.00133564	0.000269636	0.0142911	8.4	0.0259	8e-05
PET, 10 μm, Sphere	6000	10	250000	0	38500	0.230137	0.000709589	2.19178e-06	0.0097953	0.00112102	0.255577	0.008254	0.000920569	0.207941	84	0.259	0.0008
HDPE, 1000 μm, Sphere	60	10	250000	0	38500	0.000263014	2.4e-06	2.19178e-08	0.000101792	6.33563e-05	0.000291563	3.81495e-05	1.95852e-05	9.80921e-05	0.096	0.000876	8e-06
HDPE, 100 μm, Sphere	600	10	250000	0	38500	0.00263014	2.4e-05	2.19178e-07	0.000101792	6.35514e-05	0.000286599	3.81495e-05	1.96056e-05	9.83024e-05	0.96	0.00876	8e-05
HDPE, 10 μm, Sphere	6000	10	250000	0	38500	0.0263014	0.00024	2.19178e-06	0.000101792	6.40944e-05	0.000282263	3.81495e-05	1.95877e-05	9.60177e-05	9.6	0.0876	0.0008
LDPE, 1000 μm, Sphere	60	10	250000	0	38500	0.000832877	4.27397e-06	2.19178e-08	0.000180118	0.000133266	0.000541133	3.54426e-05	1.20037e-05	0.000174791	0.304	0.00156	8e-06
LDPE, 100 μm, Sphere	600	10	250000	0	38500	0.00832877	4.27397e-05	2.19178e-07	0.000180118	0.000133249	0.000538968	3.54426e-05	1.20142e-05	0.000174309	3.04	0.0156	8e-05
LDPE, 10 μm, Sphere	6000	10	250000	0	38500	0.0832877	0.000427397	2.19178e-06	0.000180118	0.000133206	0.00052144	3.54426e-05	1.20068e-05	0.000167822	30.4	0.156	0.0008
Empirical constants	x_i	tau_i	y_i	theta_i	z_i	eta_i		Ratio	PP	PS	PET	HDPE	LDPE
Degradation of PP	0.00549819	0.0137208	0.0172452	0.705493	1.61585e-05	0.442109		WSur / WCol	53.1594	15.1068	1.18673	2.66823	5.08197
Degradation of PS	0.000273254	0.243292	0.014447	1.00907	6.23305e-05	0.496037		WCol / WSur	0.0188113	0.0661952	0.842649	0.37478	0.196774
Degradation of PET	0.000243276	0.790976	1.3262e-05	1.8763	0.0152179	0.0784619		Note: Although the plastic item here differs (a 1000 μm pellet), the intercompartment ratios remain identical to those reported in the "Results" spreadsheet. This is because each compartment is assigned the same default environmental stresses; consequently, the relative differences between compartments are preserved.
Degradation of HDPE	0.0102628	3.35841e-11	0.00218253	0.299049	0.000378032	0.216488
Degradation of LDPE	0.0110506	5e-13	0.0103146	0.00436202	0.000104755	0.32406
Degradation of PE	4.72183e-09	1.34765	0.000367842	4.98976	5.33151e-05	0.65085
Fragmentation of PP	4.65659e-06	2.25917	0.000534127	5e-13	8.67563	1.43633
Fragmentation of PS	0.00722963	3.90386	3.26878e-10	0.549757	55.7464	4.94685
Fragmentation of EPS	0.0290164	9.30393e-12	1.69763e-07	4.94176	19.9123	1.34463
Comparion of weight loss from PlasticFADE with reported values in the study by Hoseini et al. (2023)
Polymer & Size & Shape	SA:V [cm-1]	I_j [W/m2]	k_frag [d-1]	k_degr [d-1]	Exposure [d]	WL_model [%]	WL_reported [%]	k_F+D_m [d-1]	k_F+D_r [d-1]	k_frag_LL [d-1]	k_frag_UL [d-1]	k_degr_LL [d-1]	k_degr_UL [d-1]	WL_m_LL [%]	WL_m_UL [%]
PP, 7.5cm*15cm*0.05mm, film	400.4	0.506667	0.00188444	6.37207e-05	41	7.67677	36.8	0.00194816	0.0111919	8.41677e-09	25648.2	3.74706e-05	8.21278e-05	0.153546	100
PS, 7.5cm*15cm*0.05mm, film	400.4	0.506667	0.0234927	8.54188e-06	41	61.8464	1.1	0.0235012	0.000269779	0.0227497	0.024253	6.30455e-06	1.13386e-05	60.6626	63.0217
Note: "_m" refers to modeled values, "_r" refers to reported values.

[truncated: 5 more sheets: Sankey, Comparison, Fig.S2, EQS 2, References]
